# Supplementary material for: Epigenome-wide association study of total serum immunoglobulin E in children: a life course approach
Source: PubMed Central journal article supplement (PMC5905182; doi:10.1186/s13148-018-0488-x), 2018-04-17

**Figure S1.** Scatter plot (cord blood DNA methylation and mid-childhood total serum IgE).

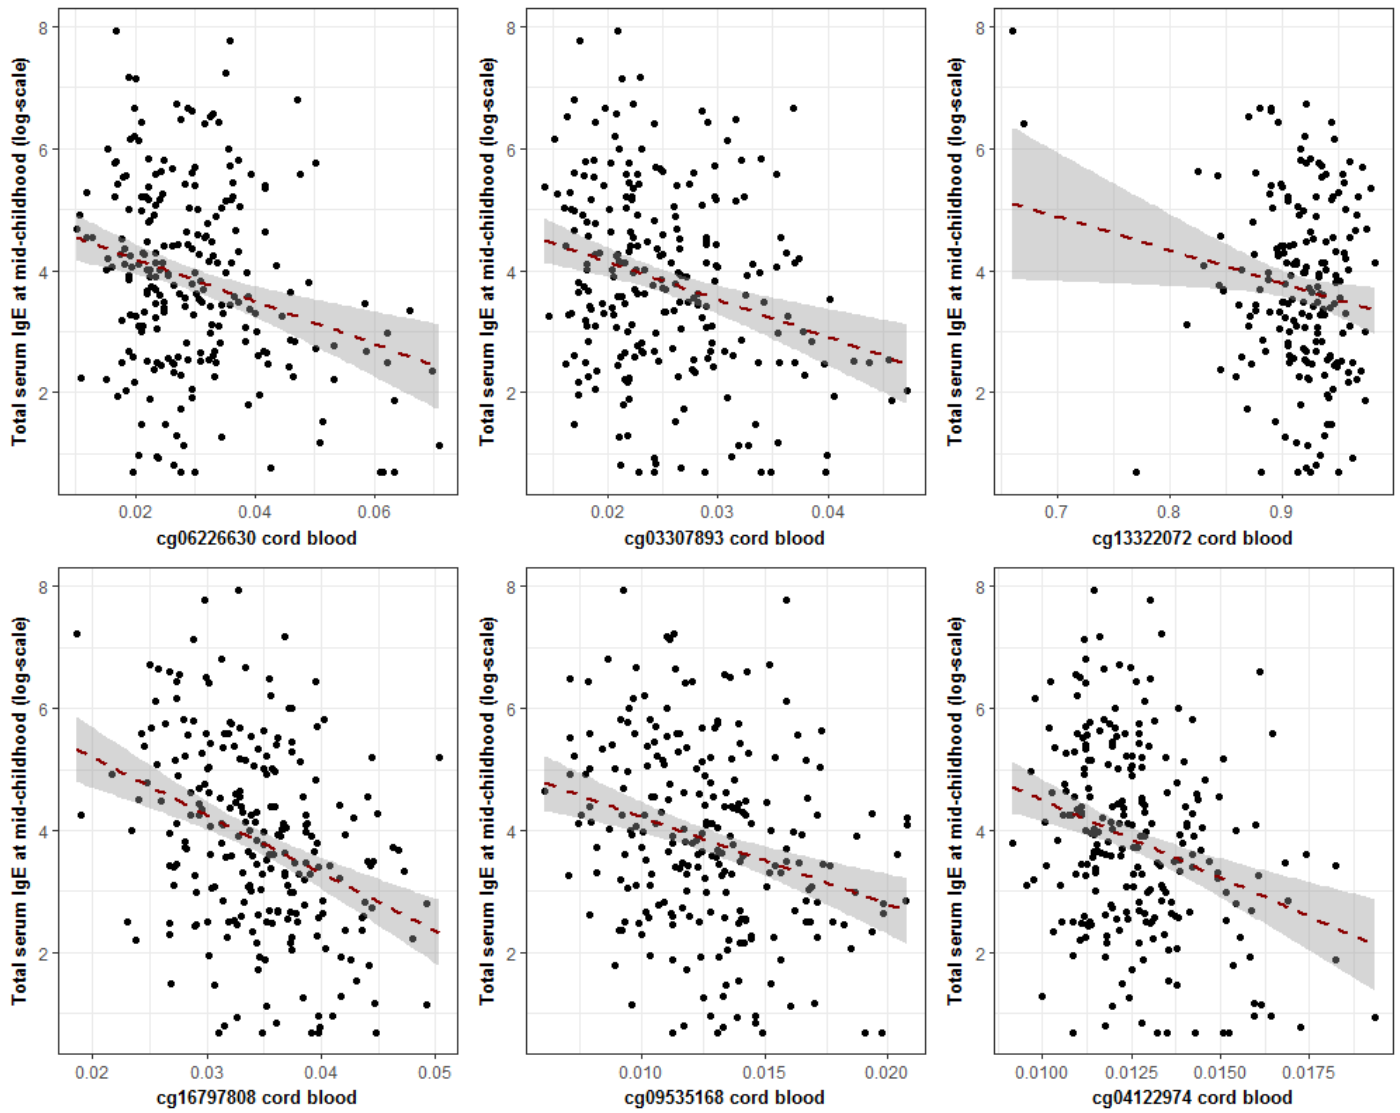

**Figure S1 continue.** Scatter plot (life course analysis: prenatal influence—top 6 methylation sites).

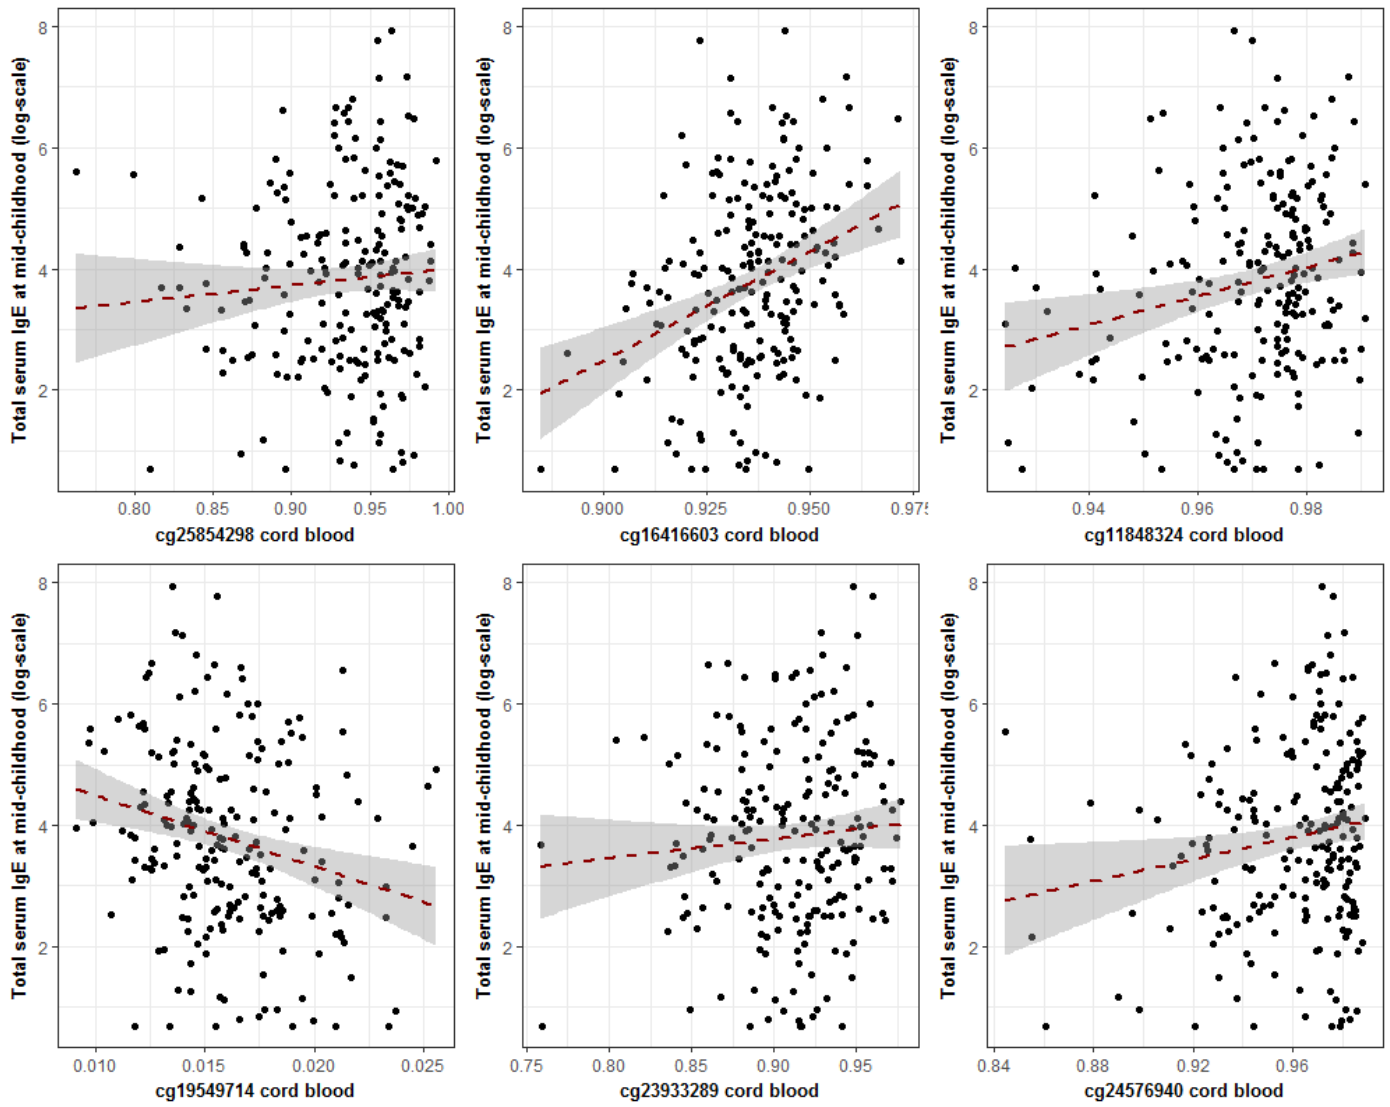

**Figure S1 continue.** Scatter plot (life course analysis: postnatal influences—top 6 methylation sites).

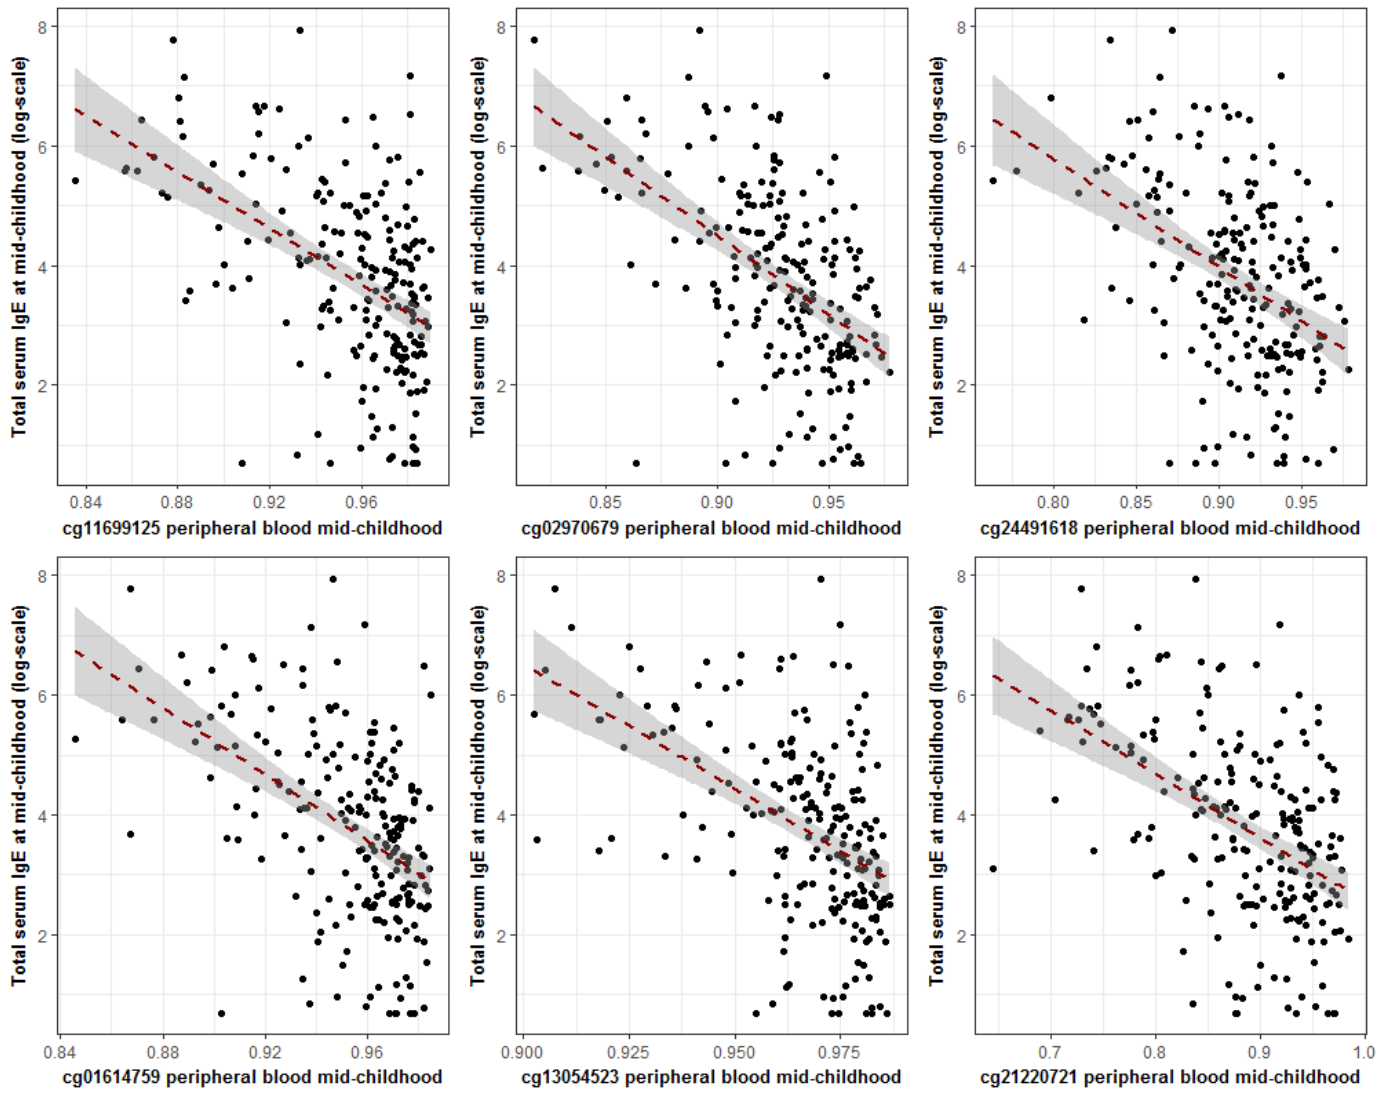

**Figure S1 continue.** Scatter plot (life course analysis: postnatal influences (asthma pathway)—top 6 methylation sites).

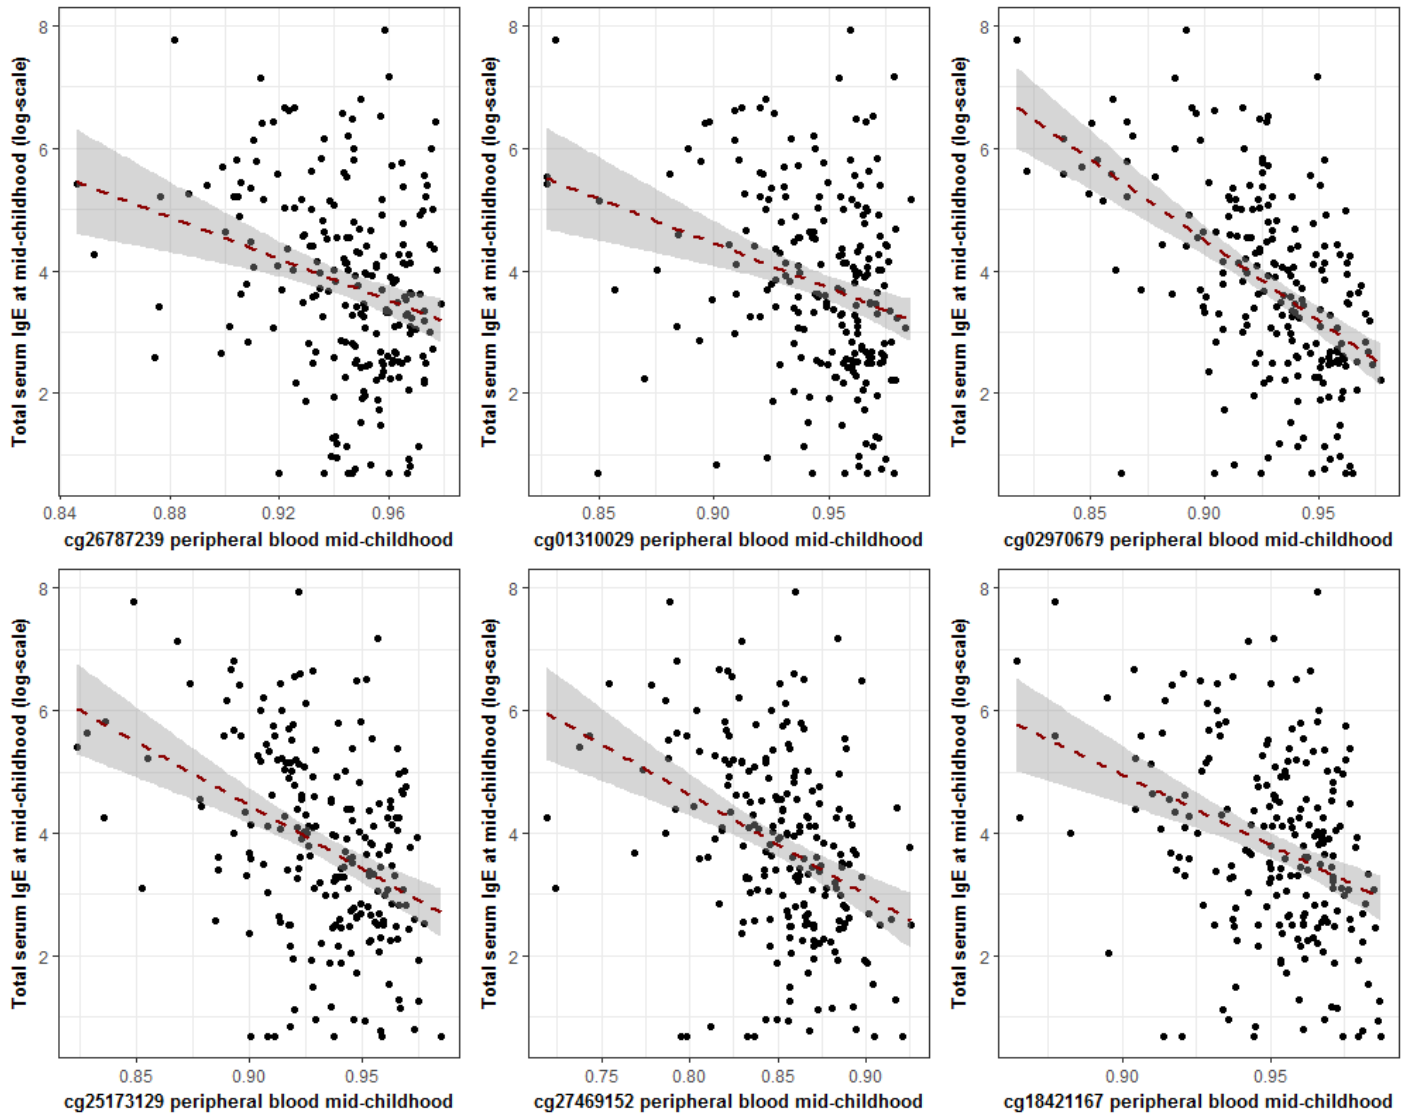

**Figure S1 continue.** Scatter plot (life course analysis—contribution of prenatal and postnatal influences—top 6 methylation sites).

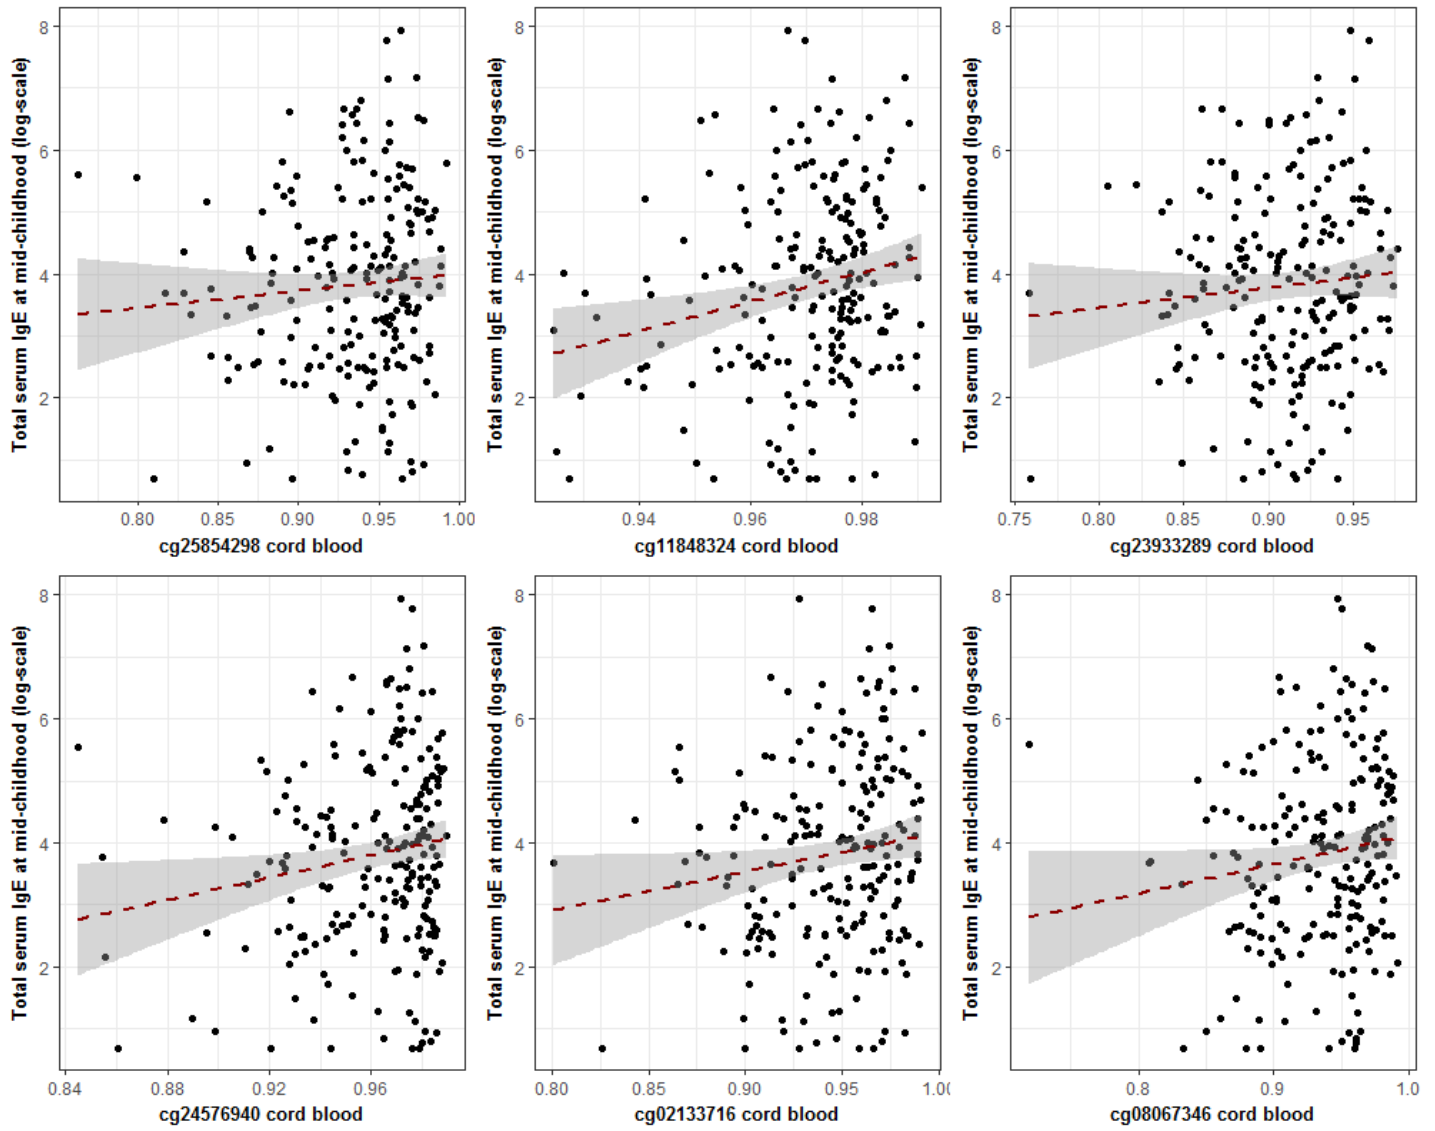

**Figure S2. QQ plots.**

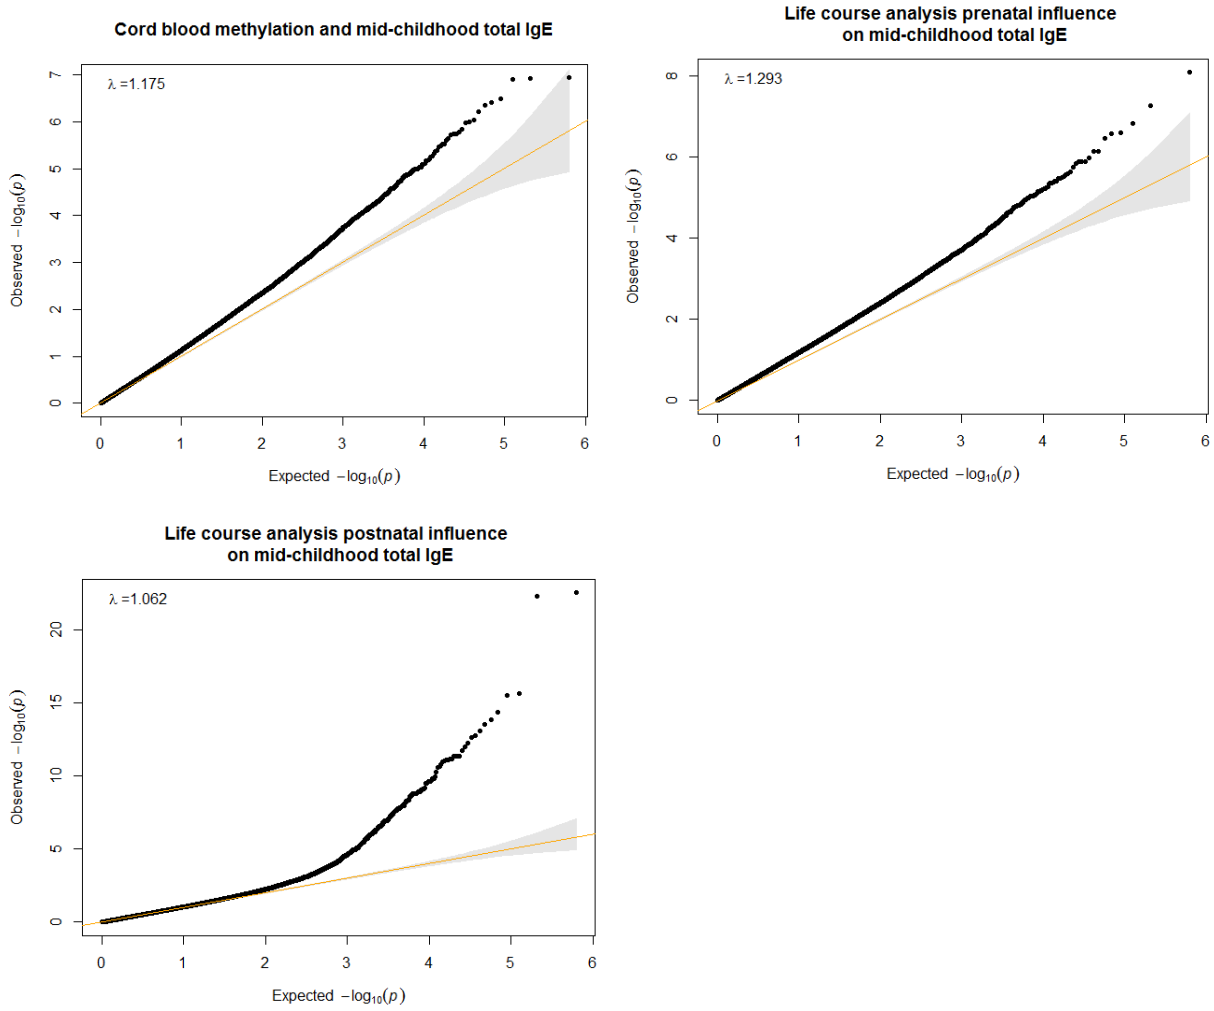

**Figure S3a.** Trend of top hits (reflect life course analysis—prenatal influence) (N=56).

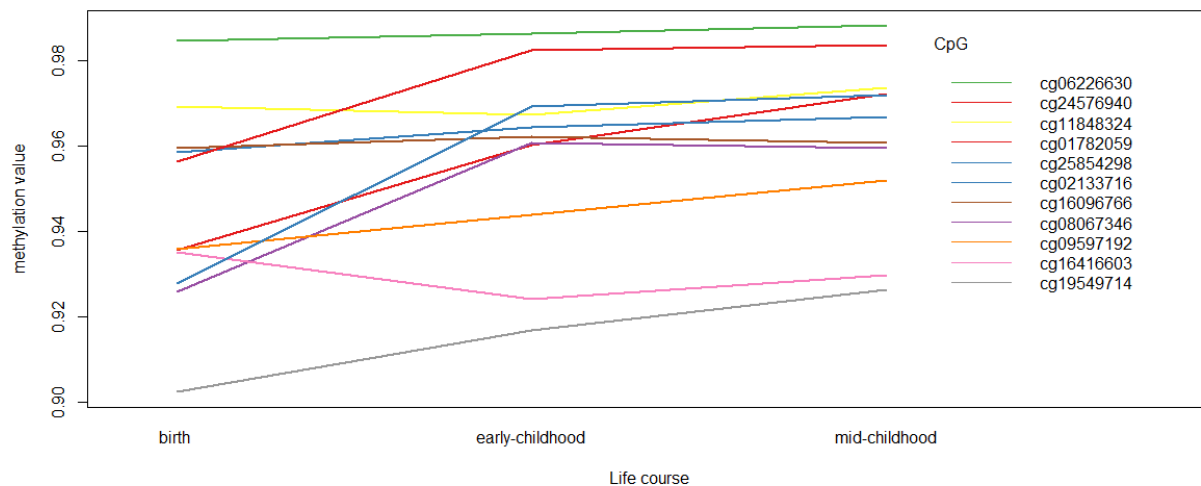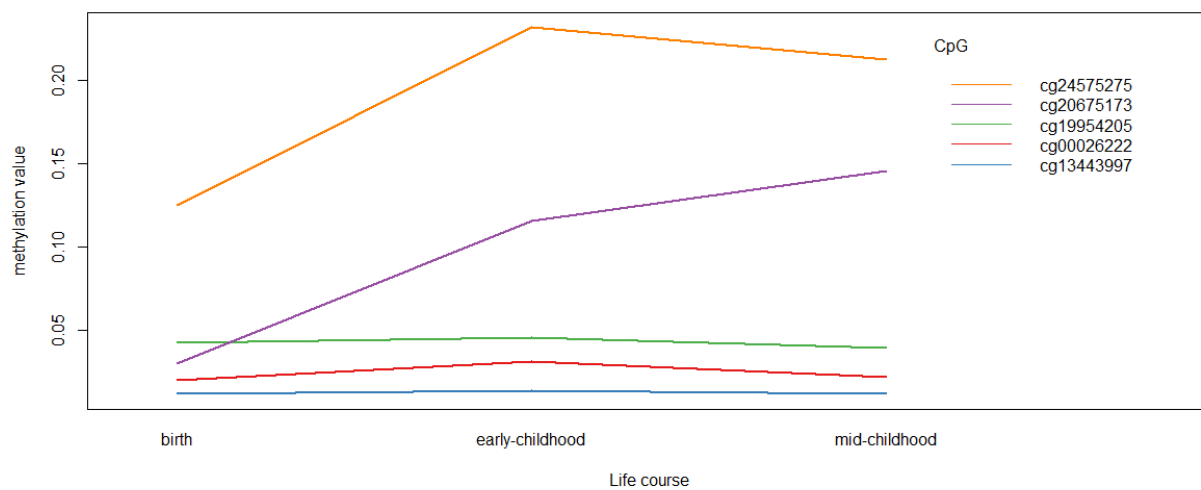

**Figure S3b.** Trend of top hits (reflect life course analysis—prenatal and postnatal influence) (N=56).

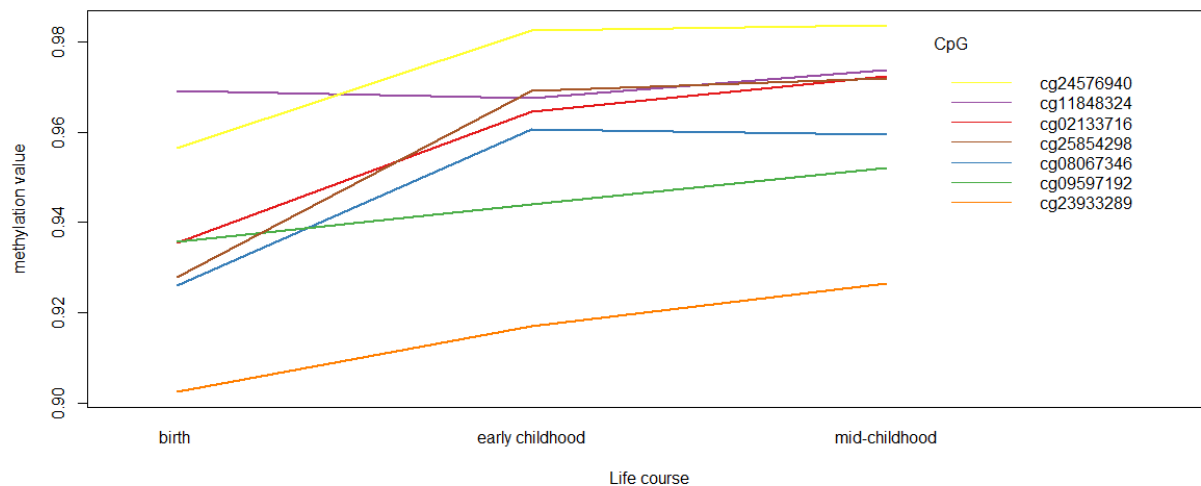



**Figure S3c.** Trend of top hits (reflect life course analysis—postnatal influence) (N=56).

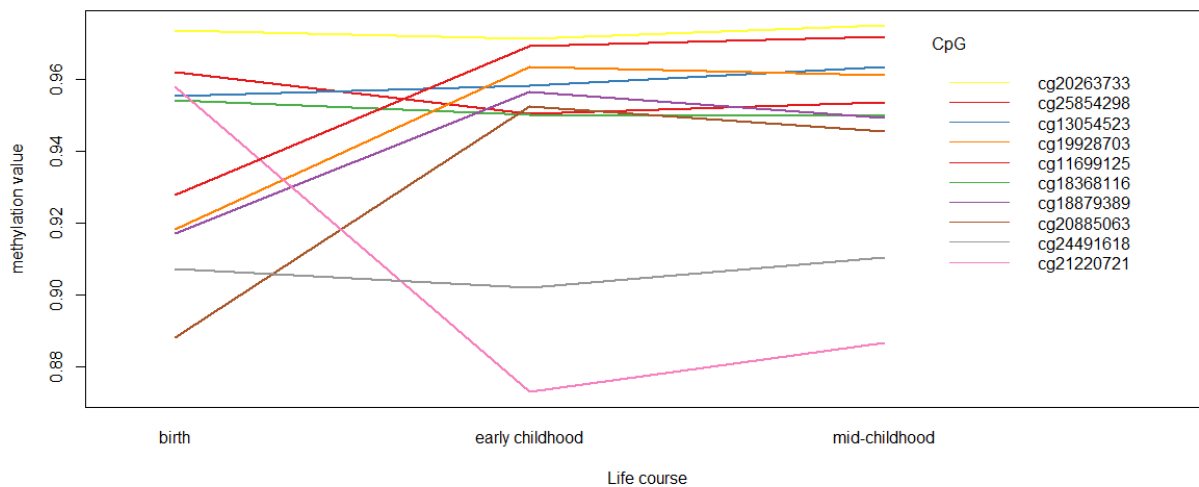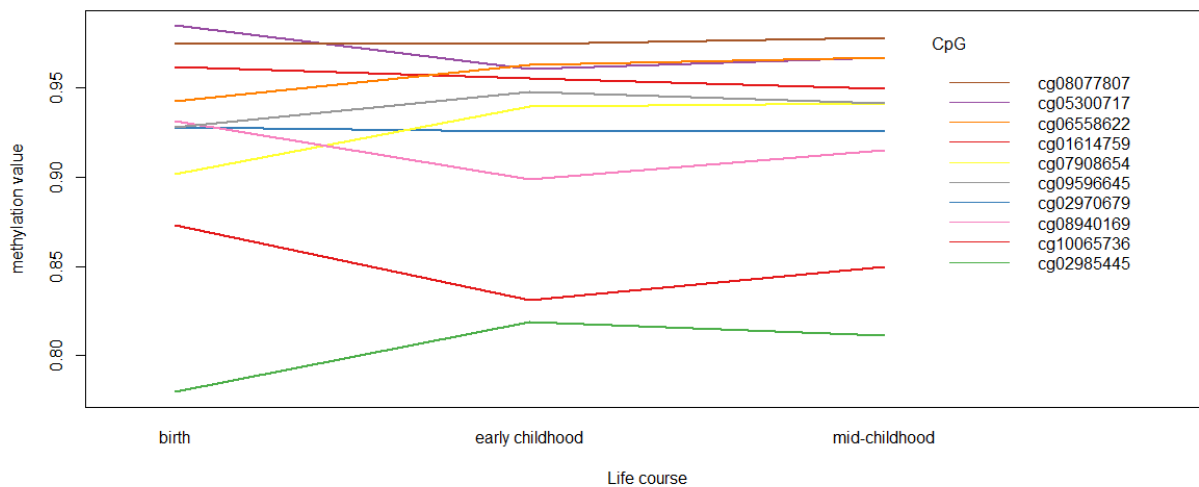

**Figure S4.** Distribution of the range of epigenome-wide significant methylation sites identified from the cord blood analysis and the life course analysis.

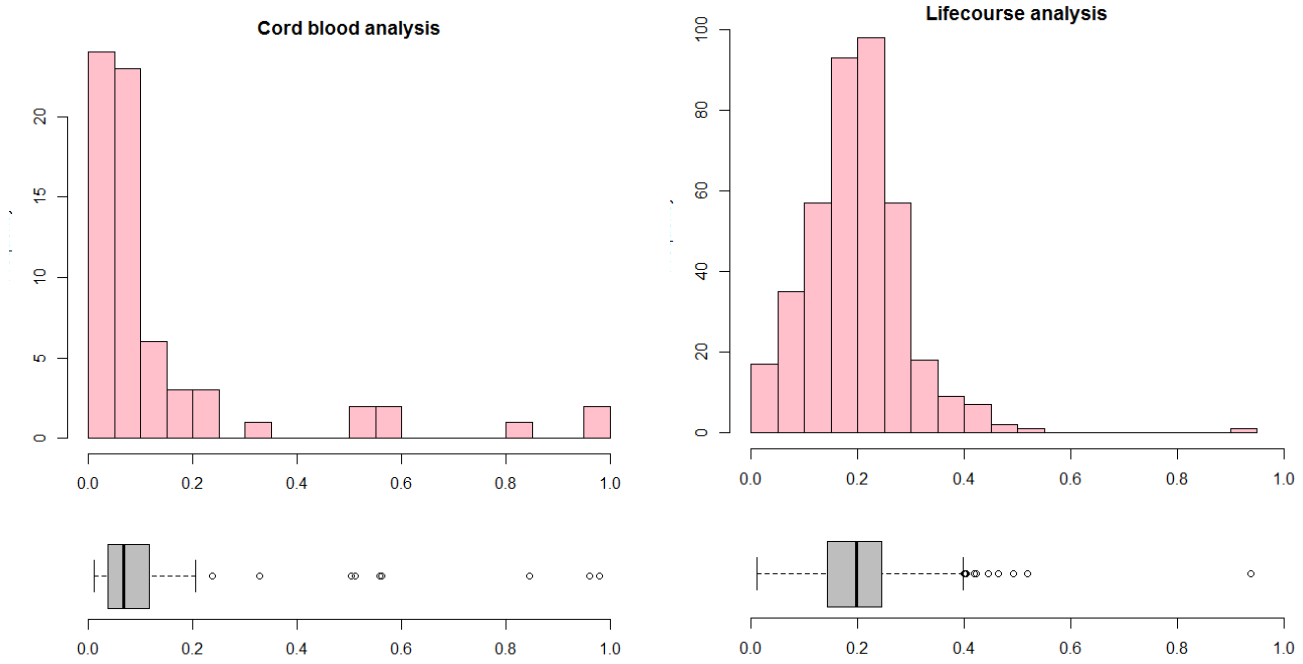

**Figure S5.** QQ plot of cord blood analysis using blood reference panel to adjust for cellular hetogeneity.

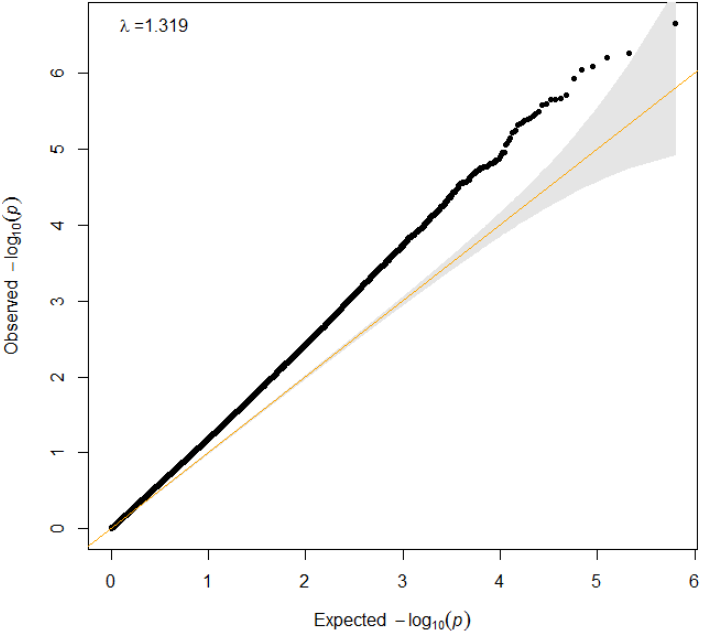

Supplement: 13148_2018_488_MOESM2_ESM.pdf [file 13148_2018_488_MOESM2_ESM.pdf]
