# Supplementary material for: Epigenome-wide association study of total serum immunoglobulin E in children: a life course approach
Source: PubMed Central journal article supplement (PMC5905182; doi:10.1186/s13148-018-0488-x), 2018-04-17
Supplement: 13148_2018_488_MOESM1_ESM.pdf [file 13148_2018_488_MOESM1_ESM.pdf]

**Table S1.** Descriptive characteristics of study participants in Project Viva.

| <b>Participant characteristics</b>        | <b>Overall<br/>(N=616)</b> | <b>Cord blood<br/>(N=242)</b> | <b>Mid-childhood<br/>(N=411)</b> | <b>Both time points<br/>(N=217)</b> |
|-------------------------------------------|----------------------------|-------------------------------|----------------------------------|-------------------------------------|
| <b>Maternal characteristics</b>           |                            |                               |                                  |                                     |
| Age (years), mean $\pm$ SD                | 32.1 (5.5)                 | 32.0 (5.6)                    | 32.3 (5.5)                       | 32.3 (5.4)                          |
| Smoking status, N (%)                     |                            |                               |                                  |                                     |
| Smoked during pregnancy                   | 61 (10%)*                  | 24 (10%)                      | 41 (10%)                         | 20 (9%)                             |
| Former smoker                             | 122 (20%)                  | 53 (22%)                      | 83 (20%)                         | 49 (23%)                            |
| Never smoker                              | 431 (70%)                  | 165 (68%)                     | 287 (70%)                        | 148 (68%)                           |
| College graduate, N (%)                   |                            |                               |                                  |                                     |
| Yes                                       | 407 (67%) <sup>‡</sup>     | 158 (65%)                     | 271 (66%)*                       | 144 (66%)                           |
| No                                        | 205 (33%)                  | 84 (35%)                      | 138 (34%)                        | 73 (34%)                            |
| Atopy history                             |                            |                               |                                  |                                     |
| Yes                                       | 241 (39%) <sup>‡</sup>     | 90 (37%)                      | 163 (40%)*                       | 80 (37%)                            |
| No                                        | 371 (61%)                  | 152 (63%)                     | 246 (60%)                        | 137 (63%)                           |
| <b>Child characteristics</b>              |                            |                               |                                  |                                     |
| Gestational age (weeks), mean $\pm$ SD    | 39.6 (1.6)                 | 39.7 (1.6)                    | 39.6 (1.6)                       | 39.7 (1.6)                          |
| Age at blood drawn (years), mean $\pm$ SD | 7.8 (0.8)*                 | 7.8 (0.7) <sup>‡</sup>        | 7.8 (0.7) <sup>‡</sup>           | 7.8 (0.7)                           |
| Sex, N (%)                                |                            |                               |                                  |                                     |
| Female                                    | 302 (49%)                  | 117 (48%)                     | 201 (49%)                        | 105 (48%)                           |
| Male                                      | 314 (51%)                  | 125 (52%)                     | 210 (51%)                        | 112 (52%)                           |
| Race, N (%)                               |                            |                               |                                  |                                     |
| White                                     | 383 (62%)*                 | 161 (67%)                     | 256 (62%) <sup>‡</sup>           | 143 (66%)                           |
| Black                                     | 121 (20%)                  | 42 (17%)                      | 77 (19%)                         | 39 (18%)                            |
| Other                                     | 110 (18%)                  | 39 (16%)                      | 77 (19%)                         | 35 (16%)                            |
| Total serum IgE level, (kU/L)             | 149.8 (296.4)              | 146.4 (310.2)                 | 152.1 (286.2)                    | 142.5 (311.0)                       |

\* number of missings=2; <sup>†</sup> number of missings =1; <sup>‡</sup> number of missings=4

Table S2. Association between cord blood DNA methylation and mid-childhood IgE (FDR threshold <0.10). Results are expressed as the change in log(IgE) level per 1% increase in cord blood methylation value.

| CpG       | CHR | MAPINFO  | Gene      | Estimate | P value  | FDR   |
|-----------|-----|----------|-----------|----------|----------|-------|
| cg0622663 | 4   | 48493420 | ZAR1      | -0.4     | 1.15E-07 | 0.013 |
| cg0330789 | 15  | 26108683 | ATP10A    | -0.76    | 1.20E-07 | 0.013 |
| cg1332207 | 7   | 98784083 | KPNA7     | -0.11    | 1.23E-07 | 0.013 |
| cg1679780 | 14  | 99948289 | SETD3;CCN | -0.9     | 3.18E-07 | 0.023 |
| cg0953516 | 19  | 19431582 | MAU       | -1.44    | 3.91E-07 | 0.023 |
| cg0412297 | 22  | 39916495 | ATF4      | -3.02    | 4.46E-07 | 0.023 |
| cg0152777 | 11  | 71956145 | PHOX2A    | -0.24    | 6.06E-07 | 0.027 |
| cg2457527 | 7   | 1094737  | C7orf50   | -0.29    | 9.23E-07 | 0.032 |
| cg1492042 | 5   | 1.77E+08 | PDLIM7    | -1       | 1.01E-06 | 0.032 |
| cg0539920 | 19  | 46010836 | VASP      | -1.33    | 1.03E-06 | 0.032 |
| cg0950792 | 5   | 1.4E+08  | IK;NDUFA2 | -2.03    | 1.46E-06 | 0.04  |
| cg2411489 | 14  | 23834349 | EFS       | -0.76    | 1.65E-06 | 0.04  |
| cg0506380 | 1   | 36772417 | C1orf113  | -1.26    | 1.79E-06 | 0.04  |
| cg1416785 | 1   | 1.2E+08  | NA        | 0.1      | 1.83E-06 | 0.04  |
| cg0222867 | 17  | 40259724 | DHX58     | -0.27    | 1.90E-06 | 0.04  |
| cg1460775 | 9   | 1.4E+08  | C9orf140  | -0.49    | 2.25E-06 | 0.044 |
| cg2463041 | 1   | 2.17E+08 | ESRRG     | -0.41    | 2.49E-06 | 0.046 |
| cg2721290 | 15  | 92708880 | SLCO3A1   | 0.97     | 2.91E-06 | 0.048 |
| cg1460559 | 9   | 94900583 | LOC100128 | -0.16    | 2.93E-06 | 0.048 |
| cg0068896 | 4   | 21950567 | KCNIP4    | -0.7     | 3.32E-06 | 0.051 |
| cg2497558 | 12  | 1.21E+08 | MLEC      | 0.63     | 3.44E-06 | 0.051 |
| cg2546124 | 8   | 1019317  | NA        | 0.62     | 4.13E-06 | 0.059 |
| cg0673341 | 6   | 85473344 | TBX18     | -0.49    | 4.36E-06 | 0.06  |
| cg1833593 | 6   | 2765945  | WRNIP1    | -2.49    | 4.72E-06 | 0.062 |
| cg1105105 | 8   | 11058145 | XKR6      | -0.59    | 5.26E-06 | 0.066 |
| cg0125265 | 19  | 7198410  | INSR      | -0.61    | 5.70E-06 | 0.069 |
| cg2744811 | 7   | 1.57E+08 | PTPRN2    | -0.91    | 6.23E-06 | 0.071 |
| cg2366431 | 19  | 36630914 | CAPNS1    | -2.92    | 6.33E-06 | 0.071 |
| cg0226569 | 7   | 36711771 | AOAH      | -0.95    | 6.63E-06 | 0.071 |
| cg1161324 | 19  | 30302405 | CCNE1     | -0.62    | 6.81E-06 | 0.071 |
| cg0776796 | 17  | 41978060 | MPP2      | -1.16    | 7.74E-06 | 0.076 |
| cg2207694 | 1   | 70036106 | NA        | -0.04    | 7.97E-06 | 0.076 |
| cg2248826 | 7   | 1498641  | MICALL2   | -0.39    | 7.97E-06 | 0.076 |
| cg1164553 | 6   | 1.11E+08 | DDO       | -0.02    | 9.30E-06 | 0.077 |
| cg2556490 | 17  | 17140463 | FLCN      | -0.65    | 9.32E-06 | 0.077 |
| cg0108857 | 6   | 1.43E+08 | GPR126    | -0.51    | 9.39E-06 | 0.077 |
| cg0441368 | 6   | 71998398 | OGFRL1    | -0.59    | 9.67E-06 | 0.077 |
| cg0327034 | 6   | 28891204 | TRIM27    | -0.89    | 1.00E-05 | 0.077 |
| cg1956075 | 1   | 8086721  | ERRFI1    | -0.34    | 1.01E-05 | 0.077 |
| cg2043327 | 1   | 1.56E+08 | NA        | -1.88    | 1.01E-05 | 0.077 |
| cg2324059 | 11  | 47296545 | MADD      | 2.15     | 1.01E-05 | 0.077 |
| cg0559675 | 12  | 47610220 | FAM113B   | 0.12     | 1.07E-05 | 0.079 |
| cg1948047 | 2   | 559042   | NA        | 0.41     | 1.08E-05 | 0.079 |
| cg2248884 | 5   | 3607134  | NA        | -0.15    | 1.15E-05 | 0.082 |
| cg2658586 | 7   | 1.49E+08 | ZNF767    | -0.76    | 1.17E-05 | 0.082 |
| cg2170051 | 20  | 3713032  | HSPA12B   | -0.09    | 1.24E-05 | 0.082 |
| cg0966717 | 5   | 1.72E+08 | NEURL1B   | -0.49    | 1.25E-05 | 0.082 |
| cg2062533 | 2   | 1.53E+08 | STAM2     | -0.08    | 1.29E-05 | 0.082 |

|           |    |          |            |       |          |       |
|-----------|----|----------|------------|-------|----------|-------|
| cg2128976 | 17 | 78868835 | RPTOR      | 0.22  | 1.31E-05 | 0.082 |
| cg0266421 | 12 | 19592651 | AEBP2      | -0.71 | 1.32E-05 | 0.082 |
| cg0262836 | 17 | 79315269 | NA         | -0.23 | 1.35E-05 | 0.082 |
| cg1555284 | 22 | 24890809 | C22orf45;L | -0.34 | 1.36E-05 | 0.082 |
| cg2704003 | 16 | 325184   | RGS11      | -0.5  | 1.40E-05 | 0.083 |
| cg2238547 | 4  | 1.86E+08 | CCDC110    | -0.64 | 1.42E-05 | 0.083 |
| cg1904770 | 2  | 2.33E+08 | ECEL1      | -0.42 | 1.45E-05 | 0.083 |
| cg0095750 | 17 | 81054294 | NA         | 0.28  | 1.50E-05 | 0.083 |
| cg2208505 | 6  | 27661905 | NA         | -0.44 | 1.51E-05 | 0.083 |
| cg0023533 | 4  | 42117223 | BEND4      | -0.27 | 1.54E-05 | 0.083 |
| cg2624347 | 13 | 51484009 | RNASEH2B   | -1.95 | 1.63E-05 | 0.087 |
| cg2321090 | 10 | 45938664 | ALOX5      | 0.3   | 1.77E-05 | 0.093 |
| cg1577004 | 19 | 35764710 | USF2       | 0.13  | 1.80E-05 | 0.093 |
| cg0113867 | 6  | 32130686 | PPT2       | -0.99 | 1.86E-05 | 0.094 |
| cg1034003 | 2  | 2.2E+08  | ZFAND2B    | -0.56 | 1.91E-05 | 0.094 |
| cg2171133 | 16 | 1425548  | UNKL       | 0.32  | 1.91E-05 | 0.094 |
| cg0113870 | 2  | 2.19E+08 | TNS1       | 0.02  | 1.94E-05 | 0.094 |
| cg1954971 | 18 | 3447713  | TGIF1      | -1.71 | 2.01E-05 | 0.096 |
| cg0897895 | 1  | 1.2E+08  | ZNF697     | -0.62 | 2.12E-05 | 0.099 |

Model adjusted for maternal [age at enrollment (continuous), smoking status (smoking during pregnancy / former / never), college graduate (yes / no), maternal atopy history (yes / no)], children [child's sex (female / male), race (white / black / other), gestational age (continuous), age at blood drawn (continuous)], and the first five ReFACTor components.

Table S3. Life course analysis—contribution of fetal influences (FDR threshold <0.10).  
 Results are expressed as the change in log(IgE) concentration per 1% increase in cord blood methylation value.

| CpG       | CHR | MAPINFO  | Gene      | Estimate | P value  | FDR   |
|-----------|-----|----------|-----------|----------|----------|-------|
| cg2585429 | 10  | 73936754 | ASCC1     | -0.36    | 8.02E-09 | 0.003 |
| cg1641660 | 20  | 57593014 | TUBB1     | 0.58     | 5.17E-08 | 0.008 |
| cg1184832 | 14  | 20403845 | OR4K1     | 0.57     | 1.48E-07 | 0.016 |
| cg1954971 | 18  | 3447713  | TGIF1     | -2       | 2.40E-07 | 0.017 |
| cg2393328 | 1   | 1.79E+08 | FAM20B    | -0.18    | 2.66E-07 | 0.017 |
| cg2457694 | 7   | 1.51E+08 | KCNH2     | -1.54    | 3.31E-07 | 0.017 |
| cg1344399 | 9   | 1.4E+08  | PHPT1     | -3.39    | 7.11E-07 | 0.028 |
| cg1995420 | 12  | 1.22E+08 | TMEM120E  | -1.2     | 7.20E-07 | 0.028 |
| cg2067517 | 3   | 43795541 | NA        | -1.22    | 1.03E-06 | 0.033 |
| cg0622663 | 4   | 48493420 | ZAR1      | -0.39    | 1.24E-06 | 0.033 |
| cg0178205 | 1   | 44715942 | ERI3      | -0.96    | 1.25E-06 | 0.033 |
| cg0213371 | 8   | 1.29E+08 | PVT1      | -0.45    | 1.25E-06 | 0.033 |
| cg0806734 | 16  | 25011481 | ARHGAP17  | -0.24    | 1.44E-06 | 0.035 |
| cg0959719 | 6   | 32141591 | AGPAT1    | -0.31    | 1.78E-06 | 0.04  |
| cg1609676 | 13  | 52419714 | FLJ37307  | -0.36    | 2.30E-06 | 0.048 |
| cg2457527 | 7   | 1094737  | C7orf50   | -0.31    | 2.49E-06 | 0.049 |
| cg0002622 | 1   | 2144244  | NA        | -1.02    | 2.63E-06 | 0.049 |
| cg0017889 | 2   | 1.75E+08 | NA        | 1.43     | 2.96E-06 | 0.05  |
| cg1575650 | 17  | 65471461 | PITPNC1   | -0.1     | 3.09E-06 | 0.05  |
| cg2092371 | 18  | 32557027 | MAPRE2    | -1.71    | 3.21E-06 | 0.05  |
| cg0360359 | 8   | 29442834 | NA        | -0.45    | 3.37E-06 | 0.05  |
| cg2402882 | 12  | 56694932 | CS        | -0.82    | 3.87E-06 | 0.051 |
| cg0790865 | 13  | 41631052 | NA        | -0.2     | 3.94E-06 | 0.051 |
| cg1859662 | 17  | 65471321 | PITPNC1   | -0.08    | 4.04E-06 | 0.051 |
| cg1681977 | 10  | 1.03E+08 | NA        | -1.19    | 4.23E-06 | 0.051 |
| cg0960704 | 16  | 14402157 | MIR365-1  | -0.21    | 4.39E-06 | 0.051 |
| cg0338306 | 17  | 21414968 | NA        | -1.9     | 4.42E-06 | 0.051 |
| cg1407796 | 14  | 53418979 | FERMT2    | -0.23    | 5.43E-06 | 0.059 |
| cg0327034 | 6   | 28891204 | TRIM27    | -1.12    | 5.51E-06 | 0.059 |
| cg1975904 | 5   | 79135093 | NA        | 0.88     | 5.96E-06 | 0.059 |
| cg1909063 | 4   | 1.11E+08 | ELOVL6    | -1.57    | 5.97E-06 | 0.059 |
| cg1413097 | 22  | 19711023 | GP1BB;SEP | -1.83    | 6.25E-06 | 0.059 |
| cg2416645 | 19  | 45590882 | GEMIN7    | 0.18     | 6.41E-06 | 0.059 |
| cg0196550 | 1   | 2.07E+08 | PIGR      | 0.28     | 6.59E-06 | 0.059 |
| cg2405971 | 21  | 45138843 | PDXK      | -1.74    | 6.86E-06 | 0.059 |
| cg2527042 | 7   | 24965657 | OSBPL3    | -0.56    | 6.89E-06 | 0.059 |
| cg2601954 | 8   | 1.2E+08  | TNFRSF11E | 0.55     | 6.93E-06 | 0.059 |
| cg1460559 | 9   | 94900583 | LOC100128 | -0.16    | 7.69E-06 | 0.064 |
| cg2638779 | 7   | 1.5E+08  | GIMAP8    | -1.38    | 8.24E-06 | 0.064 |
| cg1164553 | 6   | 1.11E+08 | DDO       | -0.02    | 8.44E-06 | 0.064 |
| cg1105105 | 8   | 11058145 | XKR6      | -0.59    | 8.59E-06 | 0.064 |
| cg0523782 | 20  | 39945987 | NA        | -0.9     | 8.80E-06 | 0.064 |
| cg0541214 | 10  | 3827605  | KLF6      | -5.14    | 8.82E-06 | 0.064 |

|           |    |          |            |       |          |       |
|-----------|----|----------|------------|-------|----------|-------|
| cg1379258 | 20 | 43590115 | TOMM34     | -0.42 | 9.04E-06 | 0.064 |
| cg0330789 | 15 | 26108683 | ATP10A     | -0.97 | 9.12E-06 | 0.064 |
| cg1461125 | 17 | 17946468 | C17orf39   | -0.38 | 9.35E-06 | 0.064 |
| cg1197974 | 20 | 814510   | FAM110A    | -0.84 | 9.53E-06 | 0.064 |
| cg0531496 | 21 | 45393393 | AGPAT3     | 0.71  | 9.93E-06 | 0.065 |
| cg2188661 | 19 | 8274513  | LASS4      | -0.98 | 1.01E-05 | 0.065 |
| cg1555284 | 22 | 24890809 | C22orf45;L | -0.33 | 1.06E-05 | 0.067 |
| cg2266611 | 6  | 30182186 | TRIM26     | -0.84 | 1.09E-05 | 0.067 |
| cg1904114 | 11 | 1.18E+08 | TMEM25     | -0.56 | 1.14E-05 | 0.067 |
| cg2382074 | 8  | 1.45E+08 | ZC3H3      | 0.6   | 1.14E-05 | 0.067 |
| cg0889886 | 17 | 13941263 | NA         | 0.14  | 1.16E-05 | 0.067 |
| cg1732309 | 12 | 1.11E+08 | IFT81      | 0.18  | 1.20E-05 | 0.069 |
| cg2577009 | 5  | 39425547 | DAB2       | -0.33 | 1.31E-05 | 0.073 |
| cg1736448 | 16 | 30381677 | TBC1D10B   | -1.7  | 1.32E-05 | 0.073 |
| cg0962636 | 16 | 4524711  | NMRAL1;H   | -1.01 | 1.37E-05 | 0.073 |
| cg1132802 | 20 | 34207568 | SPAG4      | -1.8  | 1.42E-05 | 0.073 |
| cg1741110 | 17 | 65241599 | HELZ       | -2.06 | 1.45E-05 | 0.073 |
| cg2217670 | 3  | 1.94E+08 | NA         | -0.1  | 1.47E-05 | 0.073 |
| cg0096887 | 13 | 1.14E+08 | F10        | 0.14  | 1.49E-05 | 0.073 |
| cg0629248 | 3  | 1.83E+08 | DCUN1D1    | 1.13  | 1.53E-05 | 0.073 |
| cg0754774 | 6  | 1.28E+08 | NA         | 0.83  | 1.54E-05 | 0.073 |
| cg2258854 | 2  | 2.28E+08 | MFF        | -2.6  | 1.54E-05 | 0.073 |
| cg2062533 | 2  | 1.53E+08 | STAM2      | -0.09 | 1.55E-05 | 0.073 |
| cg0776796 | 17 | 41978060 | MPP2       | -1.47 | 1.57E-05 | 0.073 |
| cg1297223 | 9  | 91605893 | C9orf47    | -0.23 | 1.60E-05 | 0.073 |
| cg1410160 | 12 | 6797953  | ZNF384     | -0.94 | 1.60E-05 | 0.073 |
| cg1972598 | 11 | 67007604 | KDM2A      | -0.93 | 1.69E-05 | 0.075 |
| cg2485297 | 3  | 59352714 | NA         | 0.58  | 1.72E-05 | 0.075 |
| cg2148422 | 3  | 32859417 | TRIM71     | -1.98 | 1.73E-05 | 0.075 |
| cg0741059 | 3  | 66404129 | SLC25A26   | -0.28 | 1.75E-05 | 0.075 |
| cg0557645 | 11 | 1.26E+08 | HYLS1      | -0.41 | 1.87E-05 | 0.079 |
| cg2250951 | 5  | 1.23E+08 | CSNK1G3    | -3.01 | 1.89E-05 | 0.079 |
| cg1297393 | 19 | 45755125 | MARK4      | -0.9  | 1.96E-05 | 0.081 |
| cg0125265 | 19 | 7198410  | INSR       | -0.92 | 2.02E-05 | 0.082 |
| cg1101492 | 3  | 36974725 | TRANK1     | -0.47 | 2.05E-05 | 0.083 |
| cg2180900 | 19 | 6739524  | TRIP10     | -1.18 | 2.16E-05 | 0.084 |
| cg2280658 | 15 | 75871813 | PTPN9      | -2.05 | 2.19E-05 | 0.084 |
| cg0010292 | 6  | 18156401 | TPMT;KDM   | -2.42 | 2.20E-05 | 0.084 |
| cg0755102 | 1  | 2.06E+08 | SLC41A1    | 2.17  | 2.20E-05 | 0.084 |
| cg0068896 | 4  | 21950567 | KCNIP4     | -0.66 | 2.24E-05 | 0.085 |
| cg2324479 | 5  | 1.41E+08 | PCDHGA4    | -0.85 | 2.28E-05 | 0.085 |
| cg0906819 | 2  | 65357064 | RAB1A      | -0.88 | 2.33E-05 | 0.086 |
| cg2203698 | 3  | 1.41E+08 | SPSB4      | -0.68 | 2.38E-05 | 0.087 |
| cg2354076 | 19 | 1173635  | SBNO2      | -1.17 | 2.40E-05 | 0.087 |
| cg2294697 | 1  | 1.53E+08 | SPRR2F     | 0.5   | 2.45E-05 | 0.087 |
| cg1375494 | 7  | 1.56E+08 | NA         | 0.28  | 2.47E-05 | 0.087 |
| cg1086180 | 17 | 40575499 | PTRF       | -0.99 | 2.68E-05 | 0.094 |

|           |    |          |          |       |          |       |
|-----------|----|----------|----------|-------|----------|-------|
| cg0155393 | 1  | 46641061 | TSPAN1   | 0.19  | 2.79E-05 | 0.095 |
| cg0779737 | 12 | 44316362 | TMEM117  | 0.87  | 2.79E-05 | 0.095 |
| cg2647384 | 5  | 37834909 | GDNF     | -0.55 | 2.82E-05 | 0.095 |
| cg0052864 | 2  | 97536287 | SEMA4C   | -3.56 | 2.91E-05 | 0.096 |
| cg0620780 | 1  | 44398998 | ARTN     | -0.27 | 2.94E-05 | 0.096 |
| cg1517947 | 15 | 70736858 | NA       | -0.72 | 2.94E-05 | 0.096 |
| cg0691328 | 2  | 18742029 | RDH14    | -0.74 | 2.99E-05 | 0.096 |
| cg1269162 | 1  | 53152081 | C1orf163 | -2.25 | 2.99E-05 | 0.096 |

Model adjusted for maternal [age at enrollment (continuous), smoking status (smoking during pregnancy / former / never), college graduate (yes / no), maternal atopy history (yes / no)], children [child's sex (female / male), race (white / black / other), gestational age (continuous), age at blood drawn (continuous)], and the first five ReFACTor components.

Table S4. Life course analysis—contribution of postnatal influences (FDR threshold <0.10).  
 Results are expressed as the change in log(IgE) concentration per 1% increase in delta-DNAm methylation value.

| CpG       | CHR | MAPINFO  | Gene       | Estimate | P value  | FDR      |
|-----------|-----|----------|------------|----------|----------|----------|
| cg1169912 | 1   | 6341327  | ACOT7      | -0.25    | 2.81E-23 | 7.95E-18 |
| cg0297067 | 17  | 56269818 | EPX        | -0.25    | 5.06E-23 | 7.95E-18 |
| cg2449161 | 7   | 1.51E+08 | KCNH2      | -0.19    | 2.12E-16 | 2.22E-11 |
| cg0161475 | 10  | 45495435 | C10orf25;Z | -0.28    | 2.97E-16 | 2.33E-11 |
| cg1305452 | 17  | 81055722 | NA         | -0.43    | 4.23E-15 | 2.66E-10 |
| cg2122072 | 1   | 6341230  | ACOT7      | -0.11    | 1.30E-14 | 6.81E-10 |
| cg1006573 | 12  | 1.17E+08 | FBXW8      | -0.18    | 2.73E-14 | 1.23E-09 |
| cg0655862 | 7   | 1.5E+08  | ZNF862     | -0.41    | 8.05E-14 | 3.16E-09 |
| cg2585429 | 10  | 73936754 | ASCC1      | -0.4     | 1.80E-13 | 6.28E-09 |
| cg0530071 | 11  | 65546210 | DKFZp761E  | -0.33    | 2.11E-13 | 6.63E-09 |
| cg0959664 | 3   | 1.82E+08 | NA         | -0.25    | 5.56E-13 | 1.59E-08 |
| cg1992870 | 13  | 30143971 | SLC7A1     | -0.31    | 1.06E-12 | 2.78E-08 |
| cg1836811 | 14  | 21436271 | NA         | -0.27    | 1.91E-12 | 4.62E-08 |
| cg2088506 | 17  | 17939419 | ATPAF2     | -0.23    | 4.05E-12 | 9.09E-08 |
| cg0807780 | 14  | 62001072 | PRKCH      | -0.76    | 4.45E-12 | 9.11E-08 |
| cg0790865 | 13  | 41631052 | NA         | -0.26    | 4.64E-12 | 9.11E-08 |
| cg0894016 | 16  | 88540241 | ZFPM1      | -0.18    | 6.34E-12 | 1.17E-07 |
| cg1887938 | 21  | 43771120 | TFF2;TFF2  | -0.28    | 6.73E-12 | 1.17E-07 |
| cg2026373 | 3   | 1.31E+08 | ATP2C1     | -0.5     | 7.45E-12 | 1.23E-07 |
| cg0298544 | 7   | 97908505 | NA         | -0.18    | 8.09E-12 | 1.27E-07 |
| cg1358762 | 9   | 95497984 | BICD2;BICC | -0.34    | 8.84E-12 | 1.32E-07 |
| cg0199878 | 16  | 55542709 | LPCAT2     | -0.18    | 1.07E-11 | 1.53E-07 |
| cg0521942 | 10  | 11291279 | CUGBP2     | -0.21    | 1.70E-11 | 2.32E-07 |
| cg0806734 | 16  | 25011481 | ARHGAP17   | -0.3     | 2.18E-11 | 2.85E-07 |
| cg0213371 | 8   | 1.29E+08 | PVT1       | -0.54    | 2.63E-11 | 3.31E-07 |
| cg2674930 | 17  | 81043782 | METRNL     | -0.67    | 5.58E-11 | 6.74E-07 |
| cg0573664 | 4   | 3123132  | HTT        | -0.42    | 1.04E-10 | 1.21E-06 |
| cg0682419 | 1   | 47157809 | KIAA0494   | -0.3     | 1.42E-10 | 1.59E-06 |
| cg0879939 | 10  | 97049193 | PDLIM1     | -0.2     | 1.57E-10 | 1.70E-06 |
| cg0869868 | 3   | 1.71E+08 | TNIK       | -0.24    | 2.03E-10 | 2.13E-06 |
| cg1379258 | 20  | 43590115 | TOMM34     | -0.59    | 2.21E-10 | 2.24E-06 |
| cg0190157 | 14  | 95615731 | DICER1     | -0.18    | 2.30E-10 | 2.26E-06 |
| cg0407708 | 4   | 9937674  | SLC2A9     | -0.33    | 2.69E-10 | 2.56E-06 |
| cg0652881 | 2   | 47242277 | TTC7A      | -0.16    | 3.03E-10 | 2.80E-06 |
| cg1461296 | 9   | 1.31E+08 | SLC25A25   | -0.26    | 3.15E-10 | 2.83E-06 |
| cg1261452 | 4   | 1.54E+08 | MND1       | -0.13    | 6.24E-10 | 5.45E-06 |
| cg2639681 | 4   | 1.03E+08 | BANK1      | -0.3     | 7.11E-10 | 5.90E-06 |
| cg0349209 | 9   | 91994786 | SEMA4D     | -0.13    | 7.13E-10 | 5.90E-06 |
| cg0498368 | 16  | 88558223 | ZFPM1      | -0.1     | 8.25E-10 | 6.65E-06 |
| cg1833728 | 19  | 930871   | ARID3A     | -0.32    | 8.65E-10 | 6.79E-06 |
| cg1617769 | 1   | 27240669 | NR0B2      | -0.18    | 1.11E-09 | 8.51E-06 |
| cg1281987 | 11  | 57157632 | PRG2       | -0.23    | 1.21E-09 | 9.05E-06 |
| cg1507589 | 12  | 7862691  | DPPA3      | -0.46    | 1.24E-09 | 9.06E-06 |

|           |    |          |           |       |          |          |
|-----------|----|----------|-----------|-------|----------|----------|
| cg2436896 | 11 | 1.12E+08 | SIK2      | -0.52 | 1.39E-09 | 9.93E-06 |
| cg1866645 | 7  | 1.51E+08 | KCNH2     | -0.2  | 1.57E-09 | 1.06E-05 |
| cg1357685 | 9  | 97403129 | FBP1      | -0.15 | 1.58E-09 | 1.06E-05 |
| cg0369309 | 9  | 1.36E+08 | CEL       | -0.16 | 1.66E-09 | 1.06E-05 |
| cg0797094 | 7  | 1.5E+08  | ZNF862    | -0.18 | 1.67E-09 | 1.06E-05 |
| cg2031385 | 2  | 38825345 | HNRPLL    | -0.21 | 1.68E-09 | 1.06E-05 |
| cg0041407 | 20 | 35504511 | C2orf118  | -0.16 | 1.69E-09 | 1.06E-05 |
| cg1640945 | 14 | 1.01E+08 | EVL       | -0.19 | 1.77E-09 | 1.09E-05 |
| cg1145601 | 6  | 1.11E+08 | NA        | -0.17 | 2.05E-09 | 1.24E-05 |
| cg0449799 | 16 | 616212   | NHLRC4    | -0.17 | 2.29E-09 | 1.36E-05 |
| cg2527042 | 7  | 24965657 | OSBPL3    | -0.59 | 2.47E-09 | 1.44E-05 |
| cg1723345 | 4  | 1.3E+08  | PHF17     | -0.52 | 2.98E-09 | 1.70E-05 |
| cg0217078 | 14 | 69650830 | NA        | -0.16 | 4.14E-09 | 2.32E-05 |
| cg2686549 | 10 | 1.29E+08 | DOCK1     | -0.27 | 4.39E-09 | 2.38E-05 |
| cg1659981 | 1  | 2036283  | PRKCZ     | -0.16 | 4.39E-09 | 2.38E-05 |
| cg1070417 | 1  | 62209607 | INADL     | -0.18 | 4.75E-09 | 2.53E-05 |
| cg0741059 | 3  | 66404129 | SLC25A26  | -0.31 | 5.17E-09 | 2.71E-05 |
| cg2654705 | 8  | 1.42E+08 | NA        | -0.14 | 5.98E-09 | 3.08E-05 |
| cg2191972 | 8  | 11719367 | CTSB      | -0.15 | 7.12E-09 | 3.61E-05 |
| cg1514656 | 3  | 42948626 | ZNF662    | -0.12 | 8.33E-09 | 4.15E-05 |
| cg0224553 | 17 | 81043668 | METRNL    | -0.2  | 1.00E-08 | 4.88E-05 |
| cg0073668 | 8  | 1.35E+08 | ST3GAL1   | -0.22 | 1.01E-08 | 4.88E-05 |
| cg1943493 | 12 | 7104184  | LPCAT3    | -0.15 | 1.06E-08 | 5.05E-05 |
| cg2679124 | 1  | 87596895 | LOC339524 | -0.16 | 1.13E-08 | 5.30E-05 |
| cg1126739 | 21 | 45815264 | TRPM2     | -0.23 | 1.20E-08 | 5.54E-05 |
| cg0094430 | 5  | 60142446 | NA        | -0.17 | 1.23E-08 | 5.60E-05 |
| cg0455729 | 14 | 70119254 | KIAA0247  | -0.16 | 1.34E-08 | 6.01E-05 |
| cg1855084 | 14 | 1.01E+08 | EVL       | -0.16 | 1.36E-08 | 6.02E-05 |
| cg1626372 | 1  | 29523841 | MECR      | -0.17 | 1.50E-08 | 6.55E-05 |
| cg0145355 | 8  | 1.44E+08 | NA        | -0.51 | 1.61E-08 | 6.93E-05 |
| cg0672528 | 17 | 80533762 | FOXK2     | -0.26 | 1.65E-08 | 7.01E-05 |
| cg1166814 | 15 | 72636405 | HEXA      | -0.29 | 1.69E-08 | 7.06E-05 |
| cg2641543 | 14 | 1.01E+08 | EVL       | -0.28 | 1.73E-08 | 7.06E-05 |
| cg0690686 | 13 | 52734154 | NEK3      | -0.17 | 1.73E-08 | 7.06E-05 |
| cg1217216 | 13 | 1.14E+08 | PROZ      | -0.15 | 1.82E-08 | 7.33E-05 |
| cg0626393 | 11 | 916170   | CHID1     | -0.35 | 2.08E-08 | 8.27E-05 |
| cg1021044 | 1  | 6342435  | ACOT7     | -0.23 | 2.17E-08 | 8.52E-05 |
| cg0036603 | 10 | 76781121 | MYST4     | -0.51 | 2.38E-08 | 9.23E-05 |
| cg1198872 | 20 | 33416959 | NA        | -0.12 | 2.41E-08 | 9.23E-05 |
| cg2517312 | 17 | 56269410 | EPX       | -0.22 | 2.59E-08 | 9.80E-05 |
| cg2457694 | 7  | 1.51E+08 | KCNH2     | -1.66 | 2.95E-08 | 0.00011  |
| cg2623549 | 17 | 1047567  | ABR;ABR   | -0.17 | 3.10E-08 | 0.000115 |
| cg1240231 | 15 | 52135487 | TMOD3     | -0.24 | 3.31E-08 | 0.000121 |
| cg1892790 | 6  | 36238043 | PNPLA1    | -0.17 | 3.43E-08 | 0.000124 |
| cg0006815 | 1  | 2.01E+08 | CACNA1S   | -0.25 | 3.78E-08 | 0.000135 |
| cg1570063 | 11 | 57156050 | PRG2      | -0.18 | 4.13E-08 | 0.000146 |
| cg1597559 | 7  | 1.38E+08 | CREB3L2   | -0.43 | 4.32E-08 | 0.000151 |



|           |    |          |           |       |          |          |
|-----------|----|----------|-----------|-------|----------|----------|
| cg0294185 | 7  | 1.05E+08 | SRPK2     | -0.32 | 5.09E-08 | 0.000175 |
| cg1798818 | 2  | 74612222 | LOC100185 | -0.16 | 5.11E-08 | 0.000175 |
| cg0310105 | 17 | 71258936 | CPSF4L    | -0.24 | 5.68E-08 | 0.000192 |
| cg0921211 | 1  | 42630526 | GUCA2A    | -0.15 | 6.04E-08 | 0.000202 |
| cg0242783 | 19 | 51961937 | SIGLEC8   | -0.18 | 6.18E-08 | 0.000204 |
| cg2253223 | 19 | 40229215 | CLC       | -0.13 | 7.52E-08 | 0.000245 |
| cg1636214 | 5  | 10708717 | DAP       | -0.16 | 7.57E-08 | 0.000245 |
| cg0937753 | 8  | 1.41E+08 | TRAPPC9   | -0.27 | 7.82E-08 | 0.000251 |
| cg2393328 | 1  | 1.79E+08 | FAM20B    | -0.17 | 8.01E-08 | 0.000254 |
| cg0852070 | 8  | 1.42E+08 | DENND3    | -0.27 | 9.44E-08 | 0.000297 |
| cg1913166 | 3  | 17236940 | TBC1D5    | -0.12 | 9.63E-08 | 0.0003   |
| cg0791445 | 1  | 27241853 | NR0B2     | -0.17 | 9.89E-08 | 0.000305 |
| cg0956531 | 5  | 1.13E+08 | MCC       | -0.22 | 1.05E-07 | 0.000314 |
| cg2568949 | 17 | 81042554 | METRNL    | -0.16 | 1.05E-07 | 0.000314 |
| cg0686620 | 16 | 67560245 | NA        | -0.2  | 1.05E-07 | 0.000314 |
| cg0453858 | 12 | 71835737 | LGR5      | -0.33 | 1.06E-07 | 0.000314 |
| cg1497824 | 5  | 79501131 | SERINC5   | -0.16 | 1.09E-07 | 0.00032  |
| cg0179881 | 17 | 3906674  | NA        | -0.43 | 1.15E-07 | 0.000335 |
| cg2645701 | 19 | 55740188 | TMEM86B   | -0.17 | 1.17E-07 | 0.000337 |
| cg0161307 | 20 | 4764277  | RASSF2    | -0.43 | 1.18E-07 | 0.000337 |
| cg0247569 | 16 | 616220   | NHLRC4    | -0.15 | 1.23E-07 | 0.000348 |
| cg0778199 | 1  | 87655840 | NA        | -0.21 | 1.25E-07 | 0.000351 |
| cg1319755 | 20 | 60709957 | LSM14B    | -0.51 | 1.46E-07 | 0.000402 |
| cg0110430 | 11 | 4066205  | STIM1     | -0.12 | 1.46E-07 | 0.000402 |
| cg0615490 | 11 | 64642558 | EHD1      | -0.12 | 1.47E-07 | 0.000402 |
| cg1960964 | 8  | 1.25E+08 | NA        | -0.19 | 1.72E-07 | 0.000466 |
| cg2402882 | 12 | 56694932 | CS        | -0.85 | 1.95E-07 | 0.000524 |
| cg1944829 | 20 | 35504064 | C20orf118 | -0.15 | 2.01E-07 | 0.000535 |
| cg1534464 | 5  | 1.77E+08 | LMAN2     | -0.34 | 2.16E-07 | 0.00057  |
| cg1628887 | 1  | 2.06E+08 | RAB7L1    | -0.86 | 2.22E-07 | 0.000581 |
| cg0864047 | 16 | 85551478 | NA        | -0.14 | 2.24E-07 | 0.000582 |
| cg0945842 | 2  | 2.32E+08 | CAB39     | -0.19 | 2.52E-07 | 0.000646 |
| cg0133099 | 17 | 7648108  | DNAH2     | -0.15 | 2.53E-07 | 0.000646 |
| cg2746915 | 17 | 56282313 | EPX       | -0.19 | 2.59E-07 | 0.000653 |
| cg1375318 | 9  | 32989852 | APTX      | -0.25 | 2.60E-07 | 0.000653 |
| cg0924188 | 20 | 35504371 | C20orf118 | -0.17 | 2.62E-07 | 0.000653 |
| cg1758277 | 1  | 1.55E+08 | EFNA3     | -0.29 | 2.77E-07 | 0.000685 |
| cg1548271 | 11 | 70053254 | FADD      | -0.17 | 2.81E-07 | 0.00069  |
| cg1797125 | 1  | 1.78E+08 | SEC16B    | -0.2  | 2.85E-07 | 0.000694 |
| cg0717786 | 15 | 52030746 | LYSMD2    | -0.16 | 2.88E-07 | 0.000696 |
| cg1752112 | 19 | 51961666 | SIGLEC8   | -0.2  | 3.02E-07 | 0.000724 |
| cg0349312 | 5  | 1.77E+08 | B4GALT7   | -0.24 | 3.16E-07 | 0.000752 |
| cg2487634 | 4  | 56798053 | NA        | -0.38 | 3.21E-07 | 0.000758 |
| cg0665506 | 5  | 1.79E+08 | MGAT4B    | -0.18 | 3.47E-07 | 0.000814 |
| cg0781901 | 11 | 46619375 | NA        | -0.14 | 3.97E-07 | 0.000924 |
| cg2578021 | 3  | 35785041 | MIR128-2  | -0.2  | 4.24E-07 | 0.000979 |
| cg1980516 | 1  | 1.6E+08  | CCDC19    | -0.19 | 4.27E-07 | 0.000979 |

|           |    |          |            |       |          |          |
|-----------|----|----------|------------|-------|----------|----------|
| cg1177032 | 13 | 80066032 | NDFIP2     | -0.13 | 4.66E-07 | 0.001061 |
| cg1362844 | 9  | 1.35E+08 | MED27      | -0.15 | 4.72E-07 | 0.001067 |
| cg1461387 | 20 | 35504198 | C20orf118  | -0.15 | 5.02E-07 | 0.001125 |
| cg0240242 | 19 | 41255444 | C19orf54;S | -0.16 | 5.05E-07 | 0.001125 |
| cg2625207 | 1  | 61607055 | NFIA       | -0.14 | 5.24E-07 | 0.001159 |
| cg2123931 | 7  | 23640510 | CCDC126    | -0.15 | 5.99E-07 | 0.001316 |
| cg0867901 | 19 | 12997997 | KLF1       | -0.18 | 6.16E-07 | 0.001344 |
| cg0639141 | 3  | 71295684 | FOXP1      | -0.19 | 6.38E-07 | 0.001383 |
| cg1897234 | 1  | 28195327 | NA         | -0.23 | 6.59E-07 | 0.001415 |
| cg0429013 | 7  | 65439512 | GUSB       | -0.31 | 6.62E-07 | 0.001415 |
| cg2291953 | 3  | 48334413 | NA         | -0.19 | 6.85E-07 | 0.001454 |
| cg0372335 | 17 | 46047760 | CDK5RAP3   | -0.12 | 6.93E-07 | 0.001461 |
| cg1364529 | 15 | 64275810 | DAPK2      | -0.16 | 7.01E-07 | 0.001468 |
| cg0877694 | 16 | 11729131 | NA         | -0.14 | 7.16E-07 | 0.00149  |
| cg2050332 | 9  | 1.02E+08 | COL15A1    | -0.73 | 7.21E-07 | 0.00149  |
| cg0697290 | 16 | 30488321 | ITGAL      | -0.11 | 7.92E-07 | 0.001618 |
| cg1348065 | 1  | 4795012  | AJAP1      | -0.93 | 7.93E-07 | 0.001618 |
| cg2222157 | 3  | 1.96E+08 | PCYT1A     | -0.18 | 7.98E-07 | 0.001618 |
| cg1620576 | 20 | 4764312  | RASSF2     | -0.75 | 8.47E-07 | 0.001706 |
| cg2728812 | 12 | 1.11E+08 | HVCN1      | -0.23 | 8.80E-07 | 0.001761 |
| cg1590973 | 3  | 69811645 | MITF       | -0.48 | 8.92E-07 | 0.001774 |
| cg0933250 | 1  | 1.6E+08  | COPA       | -0.63 | 9.29E-07 | 0.001828 |
| cg2281634 | 8  | 26243601 | BNIP3L     | -0.29 | 9.31E-07 | 0.001828 |
| cg1924703 | 21 | 43786727 | TFF1       | -0.34 | 9.37E-07 | 0.001829 |
| cg2405880 | 1  | 66777579 | PDE4B      | -0.21 | 1.00E-06 | 0.00194  |
| cg2351668 | 10 | 1.04E+08 | NOLC1      | -0.14 | 1.03E-06 | 0.001985 |
| cg0992918 | 12 | 92501570 | NA         | -0.19 | 1.04E-06 | 0.001993 |
| cg1665819 | 10 | 71075744 | HK1        | -0.52 | 1.07E-06 | 0.002025 |
| cg1420171 | 7  | 47679990 | NA         | 0.51  | 1.07E-06 | 0.002025 |
| cg0664878 | 3  | 1.05E+08 | ALCAM      | -0.4  | 1.11E-06 | 0.002088 |
| cg1622580 | 8  | 1.27E+08 | NA         | -0.12 | 1.12E-06 | 0.002095 |
| cg2646647 | 16 | 15993454 | NA         | -0.13 | 1.20E-06 | 0.002231 |
| cg2037900 | 12 | 53271818 | NA         | -0.14 | 1.21E-06 | 0.002236 |
| cg1975984 | 17 | 56283364 | MKS1       | -0.15 | 1.25E-06 | 0.002297 |
| cg1043354 | 17 | 41472748 | NA         | -0.17 | 1.35E-06 | 0.002466 |
| cg2677497 | 6  | 1.59E+08 | TMEM181    | -0.24 | 1.37E-06 | 0.002488 |
| cg0763622 | 11 | 63466987 | RTN3       | -0.22 | 1.40E-06 | 0.002514 |
| cg2410850 | 1  | 1.79E+08 | FAM20B     | -0.12 | 1.40E-06 | 0.002514 |
| cg0894564 | 5  | 205863   | CCDC127    | -0.35 | 1.44E-06 | 0.002571 |
| cg1979883 | 7  | 1.4E+08  | PARP12     | -0.11 | 1.54E-06 | 0.002734 |
| cg0427941 | 1  | 2.31E+08 | NA         | 0.09  | 1.61E-06 | 0.002842 |
| cg2685198 | 5  | 1.26E+08 | NA         | -0.12 | 1.74E-06 | 0.003054 |
| cg1325865 | 1  | 45244184 | RPS8       | -0.27 | 1.77E-06 | 0.00309  |
| cg1101492 | 3  | 36974725 | TRANK1     | -0.47 | 1.83E-06 | 0.003159 |
| cg1842116 | 17 | 56276490 | EPX        | -0.25 | 1.83E-06 | 0.003159 |
| cg2635271 | 7  | 36024391 | NA         | -0.19 | 1.85E-06 | 0.003176 |
| cg2314485 | 3  | 1.93E+08 | OPA1       | -0.3  | 1.87E-06 | 0.003193 |

|           |    |          |            |       |          |          |
|-----------|----|----------|------------|-------|----------|----------|
| cg2487257 | 19 | 41129881 | LTBP4      | -0.29 | 1.99E-06 | 0.00338  |
| cg2636938 | 7  | 1E+08    | TFR2       | -0.11 | 2.04E-06 | 0.003446 |
| cg0164964 | 20 | 35177530 | MYL9       | -0.18 | 2.06E-06 | 0.003461 |
| cg1773884 | 2  | 31094363 | NA         | -0.15 | 2.08E-06 | 0.003475 |
| cg0469250 | 11 | 47401027 | SPI1       | -0.16 | 2.09E-06 | 0.003475 |
| cg0088137 | 15 | 1.02E+08 | NA         | -0.46 | 2.45E-06 | 0.00403  |
| cg1604666 | 20 | 35422698 | C2orf117   | -0.14 | 2.45E-06 | 0.00403  |
| cg2186123 | 8  | 1.42E+08 | SLC45A4    | -0.23 | 2.49E-06 | 0.004075 |
| cg2387127 | 7  | 1577697  | MAFK       | -0.19 | 2.65E-06 | 0.004314 |
| cg1425248 | 1  | 61331027 | NA         | -0.49 | 2.75E-06 | 0.004454 |
| cg0002110 | 14 | 92980026 | RIN3       | -1.19 | 2.79E-06 | 0.004496 |
| cg0097878 | 17 | 71185631 | NA         | -0.2  | 2.84E-06 | 0.004553 |
| cg1221368 | 6  | 24877462 | FAM65B     | -0.29 | 3.28E-06 | 0.005231 |
| cg2323426 | 14 | 55582407 | NA         | -0.18 | 3.30E-06 | 0.005237 |
| cg2438065 | 13 | 31308509 | ALOX5AP    | -0.23 | 3.33E-06 | 0.005258 |
| cg1184832 | 14 | 20403845 | OR4K1      | 0.44  | 3.35E-06 | 0.005263 |
| cg0372733 | 10 | 52379467 | SGMS1      | -0.18 | 3.50E-06 | 0.005471 |
| cg0659741 | 11 | 69251883 | NA         | -0.12 | 3.53E-06 | 0.005491 |
| cg0131002 | 3  | 3152374  | IL5RA      | -0.18 | 3.55E-06 | 0.005495 |
| cg2089191 | 7  | 1.12E+08 | IFRD1      | -0.22 | 3.60E-06 | 0.005545 |
| cg0959719 | 6  | 32141591 | AGPAT1     | -0.28 | 3.70E-06 | 0.005671 |
| cg1754076 | 17 | 73631586 | RECQL5;LO  | -0.11 | 3.94E-06 | 0.00601  |
| cg0186483 | 14 | 55583639 | NA         | -0.14 | 3.99E-06 | 0.006056 |
| cg1168348 | 1  | 44678623 | DMAP1      | -0.12 | 4.09E-06 | 0.006178 |
| cg1281869 | 6  | 24877582 | FAM65B     | -0.18 | 4.13E-06 | 0.006209 |
| cg1999828 | 12 | 1.22E+08 | RNF34      | -0.12 | 4.25E-06 | 0.006344 |
| cg2081346 | 7  | 2646259  | IQCE       | -0.14 | 4.26E-06 | 0.006344 |
| cg1113770 | 14 | 21508979 | RNASE7     | -0.19 | 4.62E-06 | 0.006827 |
| cg1331233 | 2  | 74612759 | LOC100185  | -0.14 | 4.64E-06 | 0.006827 |
| cg2754578 | 1  | 2316653  | MORN1      | -0.17 | 4.65E-06 | 0.006827 |
| cg2548856 | 6  | 1.17E+08 | FAM26F     | -0.16 | 4.80E-06 | 0.007015 |
| cg0437678 | 2  | 2.19E+08 | PNKD       | -0.19 | 4.88E-06 | 0.007099 |
| cg0184451 | 7  | 1.5E+08  | ZNF862     | -0.1  | 5.10E-06 | 0.007385 |
| cg0327863 | 3  | 1.28E+08 | NA         | -0.18 | 5.44E-06 | 0.007841 |
| cg0563850 | 15 | 1.02E+08 | NA         | -0.13 | 5.59E-06 | 0.007998 |
| cg0880872 | 2  | 1.5E+08  | KIF5C;MIR1 | -0.15 | 5.60E-06 | 0.007998 |
| cg1947565 | 14 | 1.01E+08 | NA         | -0.28 | 5.74E-06 | 0.008161 |
| cg1586769 | 14 | 69438267 | ACTN1      | -0.11 | 5.79E-06 | 0.008195 |
| cg0944710 | 12 | 15126020 | PDE6H      | -0.17 | 5.89E-06 | 0.008299 |
| cg0107090 | 14 | 1.01E+08 | NA         | -0.44 | 6.15E-06 | 0.008627 |
| cg2533249 | 11 | 64756382 | BATF2      | -0.12 | 6.43E-06 | 0.008979 |
| cg0948947 | 11 | 1.02E+08 | NA         | -0.27 | 6.50E-06 | 0.009037 |
| cg1402588 | 9  | 5436224  | C9orf46    | -0.17 | 6.58E-06 | 0.009108 |
| cg2247825 | 6  | 36237982 | PNPLA1     | -0.14 | 6.73E-06 | 0.009275 |
| cg2467876 | 15 | 74902976 | CLK3       | -0.14 | 6.81E-06 | 0.009344 |
| cg0202602 | 17 | 79652703 | HGS        | -1.27 | 6.84E-06 | 0.009344 |
| cg1455535 | 5  | 1.43E+08 | ARHGAP26   | -0.26 | 7.40E-06 | 0.010066 |

|           |    |                     |       |          |          |
|-----------|----|---------------------|-------|----------|----------|
| cg2093409 | 7  | 1117418 C7orf50     | 0.87  | 7.82E-06 | 0.010572 |
| cg2267243 | 19 | 1854549 KLF16       | -0.52 | 7.84E-06 | 0.010572 |
| cg1671012 | 1  | 44716058 ERI3       | -0.22 | 7.93E-06 | 0.010619 |
| cg2489141 | 2  | 1.75E+08 WIPF1      | 1.94  | 7.96E-06 | 0.010619 |
| cg0879134 | 10 | 13831250 FRMD4A     | 0.09  | 7.99E-06 | 0.010619 |
| cg1117583 | 1  | 18806700 KLHDC7A    | -0.12 | 8.01E-06 | 0.010619 |
| cg1242570 | 4  | 75186779 NA         | -0.12 | 8.06E-06 | 0.010641 |
| cg0360359 | 8  | 29442834 NA         | -0.37 | 8.20E-06 | 0.01078  |
| cg1208230 | 1  | 6421246 ACOT7       | -0.25 | 8.24E-06 | 0.010788 |
| cg0083730 | 16 | 88473488 NA         | -0.14 | 8.42E-06 | 0.010978 |
| cg2331606 | 19 | 33761225 NA         | -0.22 | 8.57E-06 | 0.011127 |
| cg1794025 | 2  | 65179622 NA         | -0.58 | 8.99E-06 | 0.011624 |
| cg0500033 | 17 | 29817128 RAB11FIP4  | -0.13 | 9.07E-06 | 0.01168  |
| cg2335242 | 13 | 44566114 NA         | -0.13 | 9.32E-06 | 0.011953 |
| cg0011401 | 9  | 1.3E+08 SLC2A8      | -0.13 | 9.76E-06 | 0.012466 |
| cg2482367 | 19 | 5093491 KDM4B       | -0.13 | 9.92E-06 | 0.012619 |
| cg2191896 | 1  | 17751520 RCC2       | -0.14 | 1.00E-05 | 0.01267  |
| cg2226161 | 11 | 1.17E+08 BACE1      | -0.42 | 1.02E-05 | 0.012769 |
| cg1737853 | 17 | 41400661 NA         | -0.16 | 1.02E-05 | 0.012769 |
| cg2349892 | 20 | 47731131 STAU       | -0.18 | 1.02E-05 | 0.012769 |
| cg2635865 | 3  | 60740074 FHIT       | -0.9  | 1.05E-05 | 0.013061 |
| cg0636760 | 6  | 1.07E+08 NA         | -0.34 | 1.06E-05 | 0.013061 |
| cg0986250 | 1  | 1.81E+08 NA         | -0.16 | 1.06E-05 | 0.013061 |
| cg1377241 | 2  | 2.22E+08 EPHA4      | 0.13  | 1.06E-05 | 0.013061 |
| cg1992614 | 10 | 661009 DIP2C        | -0.65 | 1.07E-05 | 0.013133 |
| cg0695896 | 10 | 45494806 C10orf25;Z | -0.71 | 1.08E-05 | 0.013204 |
| cg0793780 | 19 | 3569036 NA          | -0.31 | 1.09E-05 | 0.013275 |
| cg0953552 | 16 | 88558065 ZFPM1      | -0.12 | 1.11E-05 | 0.013414 |
| cg0429927 | 17 | 25798741 KSR1       | -0.13 | 1.11E-05 | 0.013414 |
| cg0890689 | 20 | 34319899 RBM39      | 0.58  | 1.12E-05 | 0.013432 |
| cg1219214 | 14 | 55849528 KIAA0831   | -0.18 | 1.12E-05 | 0.013432 |
| cg1977526 | 19 | 5288214 PTPRS       | -0.11 | 1.14E-05 | 0.01362  |
| cg1774952 | 17 | 42466567 ITGA2B     | -0.23 | 1.15E-05 | 0.013687 |
| cg0009368 | 9  | 1.4E+08 NDOR1       | -0.2  | 1.16E-05 | 0.013702 |
| cg1724298 | 1  | 2.44E+08 NA         | -0.14 | 1.16E-05 | 0.013702 |
| cg0933571 | 17 | 62255234 TEX2       | -0.18 | 1.17E-05 | 0.013769 |
| cg0178058 | 1  | 36348359 EIF2C1     | -0.17 | 1.19E-05 | 0.013952 |
| cg0806133 | 14 | 62068941 NA         | -0.15 | 1.22E-05 | 0.014198 |
| cg1961827 | 17 | 40715228 COASY      | -0.17 | 1.22E-05 | 0.014198 |
| cg2702820 | 6  | 1.66E+08 NA         | 1.66  | 1.23E-05 | 0.014261 |
| cg2595331 | 12 | 1.12E+08 ACAD10     | -0.19 | 1.30E-05 | 0.014962 |
| cg0084415 | 12 | 6576111 VAMP1       | -0.17 | 1.30E-05 | 0.014962 |
| cg1138535 | 2  | 2.42E+08 AGXT       | -0.19 | 1.31E-05 | 0.015022 |
| cg1140902 | 1  | 44318844 ST3GAL3    | -0.46 | 1.34E-05 | 0.01531  |
| cg1348281 | 9  | 82183332 NA         | -0.32 | 1.36E-05 | 0.015427 |
| cg0191691 | 8  | 27461199 CLU        | -0.21 | 1.36E-05 | 0.015427 |
| cg1419511 | 9  | 1.15E+08 SUSD1      | -0.15 | 1.38E-05 | 0.015597 |

|           |    |          |           |       |          |          |
|-----------|----|----------|-----------|-------|----------|----------|
| cg2692269 | 6  | 33284542 | ZBTB22    | -0.15 | 1.40E-05 | 0.015767 |
| cg2740570 | 21 | 43786824 | TFF1      | -0.17 | 1.41E-05 | 0.015823 |
| cg2696470 | 12 | 1.26E+08 | AACS      | -0.16 | 1.48E-05 | 0.016549 |
| cg0810526 | 17 | 56274480 | EPX       | -0.22 | 1.55E-05 | 0.01727  |
| cg2611869 | 21 | 47599972 | C21orf56  | -0.13 | 1.57E-05 | 0.017431 |
| cg0794808 | 10 | 9805340  | NA        | -0.22 | 1.59E-05 | 0.017591 |
| cg1439265 | 17 | 6927424  | BCL6B     | -0.1  | 1.61E-05 | 0.01775  |
| cg0434864 | 3  | 1.54E+08 | NA        | -0.11 | 1.67E-05 | 0.018347 |
| cg0358624 | 7  | 1966361  | MAD1L1    | -0.05 | 1.74E-05 | 0.018983 |
| cg0813468 | 1  | 38222311 | EPHA10    | -0.12 | 1.74E-05 | 0.018983 |
| cg1848400 | 5  | 1.79E+08 | MGAT4B    | -0.49 | 1.77E-05 | 0.019178 |
| cg1692023 | 17 | 80076378 | CCDC57    | -1.14 | 1.77E-05 | 0.019178 |
| cg1976127 | 17 | 80232096 | CSNK1D    | -0.15 | 1.78E-05 | 0.01922  |
| cg1546764 | 1  | 22141014 | LDLRAD2   | -2.31 | 1.79E-05 | 0.019261 |
| cg1345860 | 9  | 1.31E+08 | ENG       | -0.17 | 1.80E-05 | 0.019303 |
| cg1322179 | 13 | 48876919 | RB1       | -0.09 | 1.81E-05 | 0.019344 |
| cg0673644 | 16 | 2801793  | LOC100128 | -0.11 | 1.85E-05 | 0.019705 |
| cg2100839 | 12 | 56120816 | CD63      | -0.15 | 1.87E-05 | 0.019783 |
| cg1448053 | 17 | 55700565 | MSI2      | -0.11 | 1.87E-05 | 0.019783 |
| cg0093735 | 6  | 86350540 | SYNCRIP   | -0.08 | 1.90E-05 | 0.020033 |
| cg0846294 | 19 | 5288631  | PTPRS     | -0.13 | 1.91E-05 | 0.020071 |
| cg0635025 | 1  | 87597369 | LOC339524 | -0.42 | 1.92E-05 | 0.020109 |
| cg0850015 | 5  | 1.5E+08  | TCOF1     | 0.22  | 1.94E-05 | 0.020118 |
| cg2678723 | 5  | 1.32E+08 | IL4       | -0.18 | 1.94E-05 | 0.020118 |
| cg1175428 | 12 | 54610419 | NA        | -0.13 | 1.94E-05 | 0.020118 |
| cg1241948 | 11 | 72933282 | P2RY2     | -0.12 | 2.03E-05 | 0.020947 |
| cg1459303 | 17 | 56296980 | MKS1      | -0.11 | 2.04E-05 | 0.020947 |
| cg0306015 | 3  | 48755856 | IP6K2     | -0.18 | 2.04E-05 | 0.020947 |
| cg0414197 | 5  | 1.64E+08 | NA        | 0.52  | 2.08E-05 | 0.021288 |
| cg1467808 | 7  | 1.28E+08 | SND1      | -0.81 | 2.10E-05 | 0.021423 |
| cg0034502 | 8  | 743875   | NA        | 0.09  | 2.12E-05 | 0.021488 |
| cg1596571 | 1  | 1.65E+08 | PBX1      | -0.17 | 2.12E-05 | 0.021488 |
| cg0804135 | 17 | 25819112 | KSR1      | -0.15 | 2.14E-05 | 0.021621 |
| cg1633589 | 12 | 1.24E+08 | NA        | -0.1  | 2.21E-05 | 0.022256 |
| cg1716226 | 2  | 63276779 | OTX1      | -0.25 | 2.29E-05 | 0.022988 |
| cg0600904 | 5  | 1.5E+08  | ANXA6     | -0.16 | 2.31E-05 | 0.023115 |
| cg1050473 | 1  | 27226971 | GPATCH3   | -1.95 | 2.32E-05 | 0.023142 |
| cg0773247 | 19 | 15390948 | BRD4      | -0.19 | 2.44E-05 | 0.024262 |
| cg1979126 | 5  | 1.76E+08 | HK3       | -0.09 | 2.47E-05 | 0.024482 |
| cg1889160 | 6  | 36319055 | NA        | -0.16 | 2.50E-05 | 0.024702 |
| cg2157326 | 1  | 44482918 | SLC6A9    | 0.16  | 2.55E-05 | 0.025117 |
| cg0686415 | 7  | 1913918  | MAD1L1    | -0.27 | 2.56E-05 | 0.025137 |
| cg1620537 | 6  | 33273460 | TAPBP     | -0.17 | 2.59E-05 | 0.025352 |
| cg1040212 | 10 | 1.26E+08 | NA        | -0.21 | 2.60E-05 | 0.025371 |
| cg0828733 | 19 | 1854633  | KLF16     | -0.79 | 2.62E-05 | 0.025487 |
| cg2054569 | 8  | 48910778 | NA        | -0.09 | 2.63E-05 | 0.025505 |
| cg0829541 | 5  | 1.57E+08 | ADAM19    | -0.4  | 2.70E-05 | 0.026103 |

|           |    |          |            |       |          |          |
|-----------|----|----------|------------|-------|----------|----------|
| cg2658498 | 12 | 93798975 | NA         | -0.64 | 2.73E-05 | 0.026232 |
| cg2026385 | 1  | 8824177  | RERE       | -0.13 | 2.73E-05 | 0.026232 |
| cg0004575 | 9  | 1.24E+08 | PHF19      | -0.51 | 2.78E-05 | 0.026565 |
| cg1063506 | 2  | 1.06E+08 | FHL2       | -0.16 | 2.79E-05 | 0.026565 |
| cg0872269 | 2  | 74378750 | NA         | -0.47 | 2.79E-05 | 0.026565 |
| cg2301285 | 1  | 2.35E+08 | NA         | -0.34 | 2.81E-05 | 0.026674 |
| cg1544270 | 5  | 1.77E+08 | FGFR4      | -0.52 | 2.82E-05 | 0.026689 |
| cg1436044 | 9  | 1.33E+08 | NA         | -0.25 | 2.83E-05 | 0.026703 |
| cg1887670 | 10 | 31107995 | NA         | -0.15 | 2.86E-05 | 0.026825 |
| cg0572022 | 7  | 1.17E+08 | ST7;ST7OT; | -0.13 | 2.86E-05 | 0.026825 |
| cg2550000 | 10 | 31117548 | NA         | -0.09 | 2.88E-05 | 0.026852 |
| cg1379164 | 10 | 1.2E+08  | RAB11FIP2  | -0.17 | 2.88E-05 | 0.026852 |
| cg0181700 | 16 | 67978182 | SLC12A4    | -0.39 | 2.95E-05 | 0.027423 |
| cg0642602 | 6  | 33232644 | VPS52      | -0.35 | 3.01E-05 | 0.027899 |
| cg2641370 | 6  | 42306808 | TRERF1     | -0.11 | 3.05E-05 | 0.028186 |
| cg2352570 | 14 | 70152683 | KIAA0247   | -0.1  | 3.08E-05 | 0.02838  |
| cg2642382 | 17 | 25898825 | KSR1       | -0.34 | 3.09E-05 | 0.028389 |
| cg1136144 | 11 | 68841024 | TPCN2      | -0.46 | 3.11E-05 | 0.028489 |
| cg0829251 | 4  | 1.17E+08 | NA         | 0.25  | 3.14E-05 | 0.028597 |
| cg1127325 | 6  | 42716703 | NA         | -0.51 | 3.14E-05 | 0.028597 |
| cg1513417 | 4  | 1.7E+08  | SH3RF1     | -0.2  | 3.16E-05 | 0.028696 |
| cg0480221 | 13 | 24895902 | C1QTNF9    | 0.54  | 3.18E-05 | 0.028795 |
| cg2765551 | 11 | 2287421  | NA         | 0.2   | 3.34E-05 | 0.03007  |
| cg1830797 | 7  | 30953124 | AQP1       | -0.1  | 3.34E-05 | 0.03007  |
| cg1865062 | 7  | 1914073  | MAD1L1     | -0.11 | 3.37E-05 | 0.030254 |
| cg1476912 | 7  | 98722470 | SMURF1     | -0.19 | 3.39E-05 | 0.030347 |
| cg1851005 | 10 | 77163383 | C10orf41   | 0.07  | 3.44E-05 | 0.030707 |
| cg0442091 | 19 | 39303993 | LGALS4     | -0.13 | 3.46E-05 | 0.030798 |
| cg2270808 | 13 | 32780062 | FRY        | -0.45 | 3.61E-05 | 0.032042 |
| cg0864804 | 1  | 11028561 | C1orf127   | -0.15 | 3.71E-05 | 0.032741 |
| cg1127776 | 7  | 1.41E+08 | TAS2R5     | -0.35 | 3.72E-05 | 0.032741 |
| cg0146448 | 11 | 67089352 | LOC10013C  | -0.19 | 3.72E-05 | 0.032741 |
| cg1166454 | 22 | 30721636 | TBC1D10A   | -0.12 | 3.78E-05 | 0.033176 |
| cg0187719 | 1  | 28559339 | DNAJC8     | -3.26 | 3.83E-05 | 0.033521 |
| cg1606287 | 17 | 25798415 | KSR1       | -0.14 | 3.92E-05 | 0.034214 |
| cg0472059 | 1  | 1.18E+08 | FAM46C     | 0.11  | 3.95E-05 | 0.03438  |
| cg0368990 | 2  | 1.36E+08 | NA         | 0.64  | 4.06E-05 | 0.03524  |
| cg2275869 | 10 | 51572216 | NCOA4      | -0.82 | 4.08E-05 | 0.035316 |
| cg2290022 | 2  | 25391773 | POMC       | -0.18 | 4.19E-05 | 0.036143 |
| cg0492374 | 1  | 2.12E+08 | RD3        | -0.11 | 4.20E-05 | 0.036143 |
| cg1832871 | 1  | 7727380  | CAMTA1     | -0.11 | 4.21E-05 | 0.036143 |
| cg1461125 | 17 | 17946468 | C17orf39   | -0.28 | 4.26E-05 | 0.036458 |
| cg1342428 | 1  | 26624129 | UBXN11     | -0.27 | 4.27E-05 | 0.036458 |
| cg1002793 | 22 | 39799092 | MAP3K7IP:  | -0.23 | 4.33E-05 | 0.03687  |
| cg2226511 | 17 | 4871194  | SPAG7      | -1.74 | 4.37E-05 | 0.03701  |
| cg1404352 | 11 | 64642516 | EHD1       | -0.12 | 4.37E-05 | 0.03701  |
| cg0101208 | 8  | 71025759 | NCOA2      | -0.1  | 4.40E-05 | 0.037164 |

|           |    |          |           |       |          |          |
|-----------|----|----------|-----------|-------|----------|----------|
| cg1420918 | 4  | 38980960 | TMEM156   | -0.2  | 4.46E-05 | 0.037554 |
| cg1594626 | 7  | 95858349 | SLC25A13  | 0.64  | 4.47E-05 | 0.037554 |
| cg2092371 | 18 | 32557027 | MAPRE2    | -1.17 | 4.54E-05 | 0.03804  |
| cg0779737 | 12 | 44316362 | TMEM117   | 0.63  | 4.62E-05 | 0.038607 |
| cg0293095 | 20 | 48806066 | CEBPB     | -0.12 | 4.67E-05 | 0.038819 |
| cg0101926 | 1  | 1.55E+08 | NA        | -0.13 | 4.67E-05 | 0.038819 |
| cg2687313 | 11 | 9191490  | DENND5A   | -0.35 | 4.70E-05 | 0.038863 |
| cg0369587 | 11 | 65547172 | DKFZp761E | -0.06 | 4.70E-05 | 0.038863 |
| cg1139658 | 6  | 33273477 | TAPBP     | -0.18 | 4.83E-05 | 0.039833 |
| cg1435548 | 21 | 22373039 | NCAM2     | -0.12 | 5.08E-05 | 0.041785 |
| cg1395100 | 1  | 1.47E+08 | LOC728985 | -0.12 | 5.10E-05 | 0.04184  |
| cg2167275 | 2  | 48340131 | NA        | -0.42 | 5.23E-05 | 0.042794 |
| cg2252529 | 19 | 50249464 | TSKS      | 0.09  | 5.32E-05 | 0.043418 |
| cg0426058 | 2  | 1E+08    | REV1;REV1 | -0.19 | 5.53E-05 | 0.045015 |
| cg0247328 | 2  | 9752386  | YWHAQ     | -0.11 | 5.55E-05 | 0.045061 |
| cg1545682 | 11 | 61717225 | BEST1     | -0.13 | 5.57E-05 | 0.045107 |
| cg0333560 | 7  | 1.39E+08 | HIPK2     | -0.18 | 5.61E-05 | 0.045278 |
| cg1197025 | 13 | 42188629 | KIAA0564  | -0.34 | 5.62E-05 | 0.045278 |
| cg1045603 | 17 | 76169212 | NA        | -0.29 | 5.77E-05 | 0.046368 |
| cg1809235 | 14 | 77242220 | VASH1     | 0.37  | 5.97E-05 | 0.047853 |
| cg0714803 | 6  | 32061160 | TNXB      | -0.24 | 6.01E-05 | 0.048051 |
| cg2303827 | 1  | 2.27E+08 | ITPKB     | -0.07 | 6.08E-05 | 0.048487 |
| cg0393595 | 16 | 23511855 | GGA2      | -0.09 | 6.26E-05 | 0.049796 |

Model adjusted for maternal [age at enrollment (continuous), smoking status (smoking during pregnancy / former / never), college graduate (yes / no), maternal atopy history (yes / no)], children [child's sex (female / male), race (white / black / other), gestational age (continuous), age at blood drawn (continuous)], and the first five ReFACTor components.

**Table S5.** Stratified analysis of methylation sites identified in the cord blood DNA methylation and mid-childhood IgE analysis. Results are expressed as the change in log(IgE) concentration per 1% increase in cord blood methylation value.

| CpG        | CHR | MAPINFO   | Gene         | White    |          | Non-white |          | Female   |          | Male     |          |
|------------|-----|-----------|--------------|----------|----------|-----------|----------|----------|----------|----------|----------|
|            |     |           |              | Estimate | P value  | Estimate  | P value  | Estimate | P value  | Estimate | P value  |
| cg06226630 | 4   | 48493420  | ZAR1         | -0.47    | 5.81E-09 | -0.07     | 7.53E-01 | -0.38    | 3.59E-04 | -0.35    | 1.64E-02 |
| cg03307893 | 15  | 26108683  | ATP10A       | -0.67    | 9.63E-05 | -1.21     | 7.47E-06 | -0.51    | 1.52E-02 | -0.90    | 8.20E-08 |
| cg13322072 | 7   | 98784083  | KPNA7        | -0.08    | 1.98E-01 | -0.12     | 1.40E-04 | -0.15    | 6.98E-05 | -0.10    | 5.34E-04 |
| cg16797808 | 14  | 99948289  | SETD3;CCNK   | -0.72    | 8.14E-04 | -1.26     | 4.22E-05 | -1.33    | 1.49E-12 | -0.46    | 4.45E-02 |
| cg09535168 | 19  | 19431582  | MAU2         | -1.43    | 7.11E-05 | -1.59     | 1.78E-02 | -1.50    | 2.52E-04 | -1.55    | 7.22E-04 |
| cg04122974 | 22  | 39916495  | ATF4         | -2.80    | 9.12E-06 | -3.62     | 5.69E-02 | -3.56    | 3.45E-05 | -2.32    | 4.69E-03 |
| cg01527777 | 11  | 71956145  | PHOX2A       | -0.26    | 1.79E-05 | -0.27     | 1.18E-03 | -0.28    | 1.15E-04 | -0.22    | 7.22E-04 |
| cg24575275 | 7   | 1094737   | C7orf50      | -0.23    | 5.58E-03 | -0.42     | 1.63E-05 | -0.43    | 4.43E-06 | -0.17    | 4.11E-02 |
| cg14920426 | 5   | 176924420 | PDLIM7       | -0.94    | 2.63E-03 | -1.16     | 3.20E-03 | -1.23    | 2.30E-03 | -0.64    | 1.97E-02 |
| cg05399209 | 19  | 46010836  | VASP         | -1.20    | 7.87E-04 | -1.29     | 3.15E-03 | -1.20    | 9.61E-04 | -1.35    | 9.06E-05 |
| cg09507928 | 5   | 140027484 | IK;NDUFA2    | -1.90    | 1.02E-03 | -2.21     | 8.86E-06 | -2.19    | 5.60E-03 | -1.76    | 1.91E-03 |
| cg24114890 | 14  | 23834349  | EFS          | -0.91    | 9.23E-08 | -0.33     | 3.75E-01 | -0.42    | 1.31E-01 | -0.95    | 2.82E-05 |
| cg05063806 | 1   | 36772417  | C1orf113     | -1.06    | 1.24E-03 | -1.29     | 4.75E-03 | -1.14    | 5.55E-03 | -1.06    | 4.78E-03 |
| cg14167858 | 1   | 120199593 | --           | 0.11     | 5.42E-05 | 0.05      | 3.37E-01 | 0.07     | 1.23E-01 | 0.11     | 4.15E-06 |
| cg02228675 | 17  | 40259724  | DHX58        | -0.27    | 1.20E-05 | -0.40     | 4.35E-03 | -0.40    | 1.22E-04 | -0.17    | 5.80E-03 |
| cg14607755 | 9   | 139962279 | C9orf140     | -0.52    | 5.93E-04 | -0.43     | 2.57E-02 | -0.61    | 3.70E-04 | -0.34    | 4.58E-02 |
| cg24630419 | 1   | 217311608 | ESRRG        | -0.44    | 4.74E-04 | -0.45     | 1.40E-03 | -0.44    | 1.36E-02 | -0.36    | 7.64E-04 |
| cg27212903 | 15  | 92708880  | SLCO3A1      | 1.12     | 4.25E-06 | 0.91      | 7.78E-02 | 1.10     | 1.35E-05 | 0.87     | 1.04E-02 |
| cg14605590 | 9   | 94900583  | LOC100128076 | -0.17    | 8.78E-05 | -0.13     | 4.11E-02 | -0.16    | 6.85E-03 | -0.12    | 9.87E-03 |

Model adjusted for maternal [age at enrollment (continuous), smoking status (smoking during pregnancy / former / never), college graduate (yes / no), maternal atopy history (yes / no)], children [gestational age (continuous), age at blood drawn (continuous)], and the first five ReFACTor components. We further adjusted for child's sex when we modeled white vs. non-white subpopulation; and adjusted for child's race when we modeled female vs. male subpopulation.

Corresponding model:  $\log(\text{IgE}) = \alpha_0 + \alpha_1 \text{CpG}_{\text{cbi}} + \alpha_2 X_2 + \dots + \alpha_p X_p + \varepsilon$



**Table S6.** Stratified analysis of methylation sites identified in the life course analysis. For the prenatal analysis, results are expressed as the change in log(IgE) concentration per 1% increase in cord blood methylation value. While for the postnatal analysis, results are expressed as the change in log(IgE) concentration per 1% increase in  $\Delta$ -DNAm methylation value.

| <i>Life course analysis—prenatal influence</i> |     |           |          |          |          |           |          |          |          |          |          |  |
|------------------------------------------------|-----|-----------|----------|----------|----------|-----------|----------|----------|----------|----------|----------|--|
| CpG                                            | CHR | MAPINFO   | Gene     | White    |          | Non-white |          | Female   |          | Male     |          |  |
|                                                |     |           |          | Estimate | P value  | Estimate  | P value  | Estimate | P value  | Estimate | P value  |  |
| cg25854298                                     | 10  | 73936754  | ASCC1    | -0.36    | 3.87E-06 | -0.36     | 8.02E-09 | -0.42    | 4.44E-04 | -0.36    | 6.95E-06 |  |
| cg16416603                                     | 20  | 57593014  | TUBB1    | 0.52     | 4.55E-05 | 0.76      | 7.46E-05 | 0.68     | 7.38E-04 | 0.49     | 2.05E-04 |  |
| cg11848324                                     | 14  | 20403845  | OR4K1    | 0.70     | 4.09E-04 | 0.41      | 8.29E-03 | 0.69     | 2.33E-04 | 0.30     | 1.25E-01 |  |
| cg19549714                                     | 18  | 3447713   | TGIF1    | -2.04    | 1.23E-05 | -2.00     | 2.40E-07 | -2.18    | 1.10E-04 | -1.60    | 5.87E-03 |  |
| cg23933289                                     | 1   | 178998656 | FAM20B   | -0.16    | 1.22E-03 | -0.18     | 2.66E-07 | -0.32    | 8.17E-05 | -0.16    | 3.02E-04 |  |
| cg24576940                                     | 7   | 150648283 | KCNH2    | -1.46    | 3.73E-04 | -1.54     | 3.31E-07 | -1.74    | 3.84E-09 | -1.37    | 1.88E-03 |  |
| cg13443997                                     | 9   | 139743586 | PHPT1    | -3.57    | 1.91E-05 | -2.66     | 4.21E-02 | -3.24    | 1.70E-02 | -2.97    | 2.08E-03 |  |
| cg19954205                                     | 12  | 122211282 | TMEM120B | -1.45    | 1.18E-05 | -1.20     | 7.20E-07 | -1.43    | 1.15E-03 | -1.02    | 4.21E-03 |  |
| cg01782059                                     | 1   | 44715942  | ERI3     | -1.10    | 1.25E-04 | -1.17     | 3.22E-04 | -0.78    | 1.84E-01 | -1.20    | 1.82E-07 |  |
| cg02133716                                     | 8   | 128981622 | PVT1     | -0.51    | 2.50E-04 | -0.46     | 1.68E-02 | -0.66    | 8.77E-08 | -0.24    | 7.52E-02 |  |
| cg06226630                                     | 4   | 48493420  | ZAR1     | -0.45    | 1.42E-07 | -0.07     | 7.95E-01 | -0.41    | 1.97E-05 | -0.24    | 1.75E-01 |  |
| cg20675173                                     | 3   | 43795541  | --       | -1.37    | 1.35E-05 | -1.22     | 1.03E-06 | -1.72    | 3.32E-03 | -1.01    | 2.28E-03 |  |
| cg08067346                                     | 16  | 25011481  | ARHGAP17 | -0.25    | 5.17E-04 | -0.24     | 1.44E-02 | -0.29    | 1.04E-03 | -0.25    | 1.33E-04 |  |
| cg09597192                                     | 6   | 32141591  | AGPAT1   | -0.26    | 1.36E-02 | -0.36     | 1.00E-05 | -0.47    | 1.46E-08 | -0.21    | 3.99E-03 |  |
| cg16096766                                     | 13  | 52419714  | FLJ37307 | -0.49    | 1.23E-05 | -0.11     | 4.59E-01 | -0.61    | 1.38E-05 | -0.29    | 1.45E-02 |  |
| cg00026222                                     | 1   | 2144244   | --       | -1.15    | 2.75E-05 | -0.71     | 1.29E-01 | -0.88    | 1.10E-02 | -0.84    | 9.33E-03 |  |
| cg24575275                                     | 7   | 1094737   | C7orf50  | -0.24    | 4.66E-03 | -0.31     | 2.49E-06 | -0.47    | 5.39E-06 | -0.16    | 5.96E-02 |  |

  

| <i>Life course analysis—postnatal influences (top 20 methylation sites)</i> |     |           |                |          |          |           |          |          |          |          |          |  |
|-----------------------------------------------------------------------------|-----|-----------|----------------|----------|----------|-----------|----------|----------|----------|----------|----------|--|
| CpG                                                                         | CHR | MAPINFO   | Gene           | White    |          | Non-white |          | Female   |          | Male     |          |  |
|                                                                             |     |           |                | Estimate | P value  | Estimate  | P value  | Estimate | P value  | Estimate | P value  |  |
| cg11699125                                                                  | 1   | 6341327   | ACOT7          | -0.27    | 5.10E-17 | -0.23     | 7.76E-11 | -0.28    | 2.61E-12 | -0.23    | 7.38E-16 |  |
| cg02970679                                                                  | 17  | 56269818  | EPX            | -0.29    | 8.79E-18 | -0.25     | 3.97E-12 | -0.28    | 1.04E-18 | -0.24    | 4.32E-16 |  |
| cg24491618                                                                  | 7   | 150649807 | KCNH2          | -0.20    | 2.13E-11 | -0.19     | 2.12E-16 | -0.22    | 1.94E-16 | -0.14    | 2.42E-04 |  |
| cg01614759                                                                  | 10  | 45495435  | C10orf25;ZNF22 | -0.30    | 1.81E-09 | -0.31     | 1.67E-11 | -0.34    | 1.55E-14 | -0.24    | 4.93E-13 |  |
| cg13054523                                                                  | 17  | 81055722  | --             | -0.49    | 3.39E-11 | -0.36     | 6.06E-07 | -0.45    | 2.93E-09 | -0.46    | 3.88E-15 |  |
| cg21220721                                                                  | 1   | 6341230   | ACOT7          | -0.10    | 5.47E-07 | -0.11     | 1.30E-14 | -0.12    | 4.40E-10 | -0.09    | 5.01E-06 |  |
| cg10065736                                                                  | 12  | 117440120 | FBXW8          | -0.18    | 7.34E-10 | -0.18     | 5.14E-07 | -0.22    | 6.32E-19 | -0.15    | 4.76E-08 |  |
| cg06558622                                                                  | 7   | 149543177 | ZNF862         | -0.42    | 2.03E-11 | -0.47     | 3.56E-10 | -0.39    | 1.02E-04 | -0.41    | 9.23E-11 |  |
| cg25854298                                                                  | 10  | 73936754  | ASCC1          | -0.44    | 8.33E-09 | -0.40     | 1.80E-13 | -0.43    | 2.88E-05 | -0.38    | 1.74E-07 |  |
| cg05300717                                                                  | 11  | 65546210  | DKFZp761E198   | -0.37    | 8.58E-11 | -0.35     | 2.86E-09 | -0.38    | 1.28E-11 | -0.30    | 1.05E-07 |  |
| cg09596645                                                                  | 3   | 181897670 | --             | -0.28    | 2.52E-09 | -0.20     | 1.34E-02 | -0.31    | 1.06E-07 | -0.21    | 2.57E-06 |  |
| cg19928703                                                                  | 13  | 30143971  | SLC7A1         | -0.38    | 4.00E-08 | -0.31     | 1.06E-12 | -0.36    | 1.17E-08 | -0.32    | 5.03E-06 |  |

|            |    |           |        |       |          |       |          |       |          |       |          |
|------------|----|-----------|--------|-------|----------|-------|----------|-------|----------|-------|----------|
| cg18368116 | 14 | 21436271  | --     | -0.30 | 1.75E-08 | -0.27 | 1.91E-12 | -0.32 | 1.11E-13 | -0.25 | 3.23E-09 |
| cg20885063 | 17 | 17939419  | ATPAF2 | -0.23 | 2.37E-08 | -0.23 | 4.05E-12 | -0.24 | 1.64E-12 | -0.16 | 2.97E-03 |
| cg08077807 | 14 | 62001072  | PRKCH  | -0.87 | 2.75E-08 | -0.77 | 4.49E-05 | -0.74 | 1.13E-04 | -0.74 | 1.26E-08 |
| cg07908654 | 13 | 41631052  | --     | -0.25 | 3.86E-09 | -0.26 | 1.51E-03 | -0.35 | 1.84E-13 | -0.20 | 5.29E-06 |
| cg08940169 | 16 | 88540241  | ZFPM1  | -0.18 | 3.50E-09 | -0.20 | 4.44E-06 | -0.21 | 9.50E-08 | -0.17 | 2.39E-08 |
| cg18879389 | 21 | 43771120  | TFF2   | -0.29 | 7.61E-11 | -0.28 | 6.73E-12 | -0.35 | 9.42E-11 | -0.24 | 1.64E-04 |
| cg20263733 | 3  | 130616293 | ATP2C1 | -0.54 | 5.28E-10 | -0.50 | 7.45E-12 | -0.62 | 2.45E-06 | -0.49 | 3.00E-05 |
| cg02985445 | 7  | 97908505  | --     | -0.18 | 5.10E-08 | -0.23 | 1.07E-06 | -0.21 | 1.74E-07 | -0.16 | 3.72E-06 |

**Life course analysis—prenatal and postnatal influence—prenatal influence**

| CpG        | CHR | MAPINFO   | Gene     | White    |          | Non-white |          | Female   |          | Male     |          |
|------------|-----|-----------|----------|----------|----------|-----------|----------|----------|----------|----------|----------|
|            |     |           |          | Estimate | P value  | Estimate  | P value  | Estimate | P value  | Estimate | P value  |
| cg25854298 | 10  | 73936754  | ASCC1    | -0.36    | 3.87E-06 | -0.36     | 8.02E-09 | -0.42    | 4.44E-04 | -0.36    | 6.95E-06 |
| cg11848324 | 14  | 20403845  | OR4K1    | 0.70     | 4.09E-04 | 0.41      | 8.29E-03 | 0.69     | 2.33E-04 | 0.30     | 1.25E-01 |
| cg23933289 | 1   | 178998656 | FAM20B   | -0.16    | 1.22E-03 | -0.18     | 2.66E-07 | -0.32    | 8.17E-05 | -0.16    | 3.02E-04 |
| cg24576940 | 7   | 150648283 | KCNH2    | -1.46    | 3.73E-04 | -1.54     | 3.31E-07 | -1.74    | 3.84E-09 | -1.37    | 1.88E-03 |
| cg02133716 | 8   | 128981622 | PVT1     | -0.51    | 2.50E-04 | -0.46     | 1.68E-02 | -0.66    | 8.77E-08 | -0.24    | 7.52E-02 |
| cg08067346 | 16  | 25011481  | ARHGAP17 | -0.25    | 5.17E-04 | -0.24     | 1.44E-02 | -0.29    | 1.04E-03 | -0.25    | 1.33E-04 |
| cg09597192 | 6   | 32141591  | AGPAT1   | -0.26    | 1.36E-02 | -0.36     | 1.00E-05 | -0.47    | 1.46E-08 | -0.21    | 3.99E-03 |

**Life course analysis—prenatal and postnatal influence—postnatal influence**

| CpG        | CHR | MAPINFO   | Gene     | White    |          | Non-white |          | Female   |          | Male     |          |
|------------|-----|-----------|----------|----------|----------|-----------|----------|----------|----------|----------|----------|
|            |     |           |          | Estimate | P value  | Estimate  | P value  | Estimate | P value  | Estimate | P value  |
| cg25854298 | 10  | 73936754  | ASCC1    | -0.44    | 8.33E-09 | -0.40     | 1.80E-13 | -0.43    | 2.88E-05 | -0.38    | 1.74E-07 |
| cg11848324 | 14  | 20403845  | OR4K1    | 0.48     | 3.36E-04 | 0.50      | 7.40E-04 | 0.34     | 9.25E-02 | 0.29     | 9.20E-02 |
| cg23933289 | 1   | 178998656 | FAM20B   | -0.20    | 7.78E-06 | -0.17     | 8.01E-08 | -0.24    | 7.34E-04 | -0.14    | 3.54E-05 |
| cg24576940 | 7   | 150648283 | KCNH2    | -1.64    | 8.58E-05 | -1.66     | 2.95E-08 | -1.89    | 1.71E-11 | -1.42    | 2.19E-03 |
| cg02133716 | 8   | 128981622 | PVT1     | -0.62    | 8.25E-09 | -0.46     | 5.26E-06 | -0.65    | 1.64E-12 | -0.42    | 1.26E-04 |
| cg08067346 | 16  | 25011481  | ARHGAP17 | -0.34    | 2.19E-07 | -0.26     | 5.14E-05 | -0.33    | 9.07E-08 | -0.32    | 1.35E-05 |
| cg09597192 | 6   | 32141591  | AGPAT1   | -0.24    | 2.34E-03 | -0.32     | 5.52E-10 | -0.40    | 2.99E-12 | -0.18    | 5.37E-04 |

Model adjusted for maternal [age at enrollment (continuous), smoking status (smoking during pregnancy / former / never), college graduate (yes / no), maternal atopy history (yes / no)], children [gestational age (continuous), age at blood drawn (continuous)], and the first five ReFACTOR components. We further adjusted for child's sex when we modeled white vs. non-white subpopulation; and adjusted for child's race when we modeled female vs. male subpopulation.

Corresponding model:  $\log(\text{IgE}) = \beta_0 + \beta_1 \text{CpG}_{\text{-cbl}} + \beta_2 \Delta \text{CpG}_i + \beta_3 X_3 + \dots + \beta_p X_p + \eta$

*Life course analysis—prenatal influence:* association between cord blood methylation and mid-childhood IgE independent of postnatal changes in DNA methylation; which correspond to  $\beta_1 \text{CpG}_{\text{-cbl}}$ ;

*Life course analysis—postnatal influence:* association between changes in postnatal DNA methylation from birth and mid-childhood IgE independent of baseline / cord blood DNA methylation; which correspond to  $\Delta\text{CpG}_i$

**Table S7.** Association between cord blood DNA methylation and mid-childhood IgE (FDR threshold <0.05)—we estimated cell proportions using blood reference panels for cord blood. Results are expressed as the change in log(IgE) concentration per 1% increase in cord blood methylation value.

| CpG        | CHR | MAPINFO   | Gene         | Estimate | P value  |
|------------|-----|-----------|--------------|----------|----------|
| cg06226630 | 4   | 48493420  | ZAR1         | -0.38    | 2.23E-06 |
| cg03307893 | 15  | 26108683  | ATP10A       | -0.58    | 7.14E-05 |
| cg13322072 | 7   | 98784083  | KPNA7        | -0.09    | 4.05E-04 |
| cg16797808 | 14  | 99948289  | SETD3;CCNK   | -0.84    | 3.25E-06 |
| cg09535168 | 19  | 19431582  | MAU2         | -1.34    | 1.92E-06 |
| cg04122974 | 22  | 39916495  | ATF4         | -2.66    | 7.07E-06 |
| cg01527777 | 11  | 71956145  | PHOX2A       | -0.22    | 2.01E-05 |
| cg24575275 | 7   | 1094737   | C7orf50      | -0.27    | 5.73E-05 |
| cg14920426 | 5   | 176924420 | PDLIM7       | -0.83    | 1.95E-05 |
| cg05399209 | 19  | 46010836  | VASP         | -1.07    | 2.83E-05 |
| cg09507928 | 5   | 140027484 | IK;NDUFA2    | -1.76    | 8.08E-07 |
| cg24114890 | 14  | 23834349  | EFS          | -0.69    | 2.20E-06 |
| cg05063806 | 1   | 36772417  | C1orf113     | -1.05    | 2.58E-05 |
| cg14167858 | 1   | 120199593 | --           | 0.01     | 0.491598 |
| cg02228675 | 17  | 40259724  | DHX58        | -0.27    | 6.06E-06 |
| cg14607755 | 9   | 139962279 | C9orf140     | -0.45    | 5.72E-06 |
| cg24630419 | 1   | 217311608 | ESRRG        | -0.36    | 5.85E-06 |
| cg27212903 | 15  | 92708880  | SLCO3A1      | 0.79     | 2.55E-05 |
| cg14605590 | 9   | 94900583  | LOC100128076 | -0.13    | 1.76E-05 |

Model adjusted for maternal [age at enrollment (continuous), smoking status (smoking during pregnancy / former / never), college graduate (yes / no), maternal atopy history (yes / no)], children [child's sex (female / male), race/ethnicity (white / black / other), gestational age (continuous), age at blood drawn (continuous)], and estimated cell proportions (percentage of monocyte, percentage of CD8T cell, percentage of CD4T cell, percentage of NK cell, percentage of B cell, percentage of nucleated red blood cells).

**Table S8.** Association between cord blood DNA methylation and mid-childhood IgE (FDR threshold <0.05) among the 217 children who had DNA methylation measurements both at birth and in mid-childhood. Results are expressed as the change in log(IgE) concentration per 1% increase in cord blood methylation value.

| CpG        | CHR | MAPINFO   | Gene         | Estimate | P value  |
|------------|-----|-----------|--------------|----------|----------|
| cg06226630 | 4   | 48493420  | ZAR1         | -0.39    | 7.59E-07 |
| cg03307893 | 15  | 26108683  | ATP10A       | -0.68    | 1.20E-05 |
| cg13322072 | 7   | 98784083  | KPNA7        | -0.12    | 1.25E-09 |
| cg16797808 | 14  | 99948289  | SETD3;CCNK   | -0.72    | 7.55E-05 |
| cg09535168 | 19  | 19431582  | MAU2         | -1.49    | 6.38E-07 |
| cg04122974 | 22  | 39916495  | ATF4         | -2.69    | 5.97E-06 |
| cg01527777 | 11  | 71956145  | PHOX2A       | -0.23    | 1.99E-07 |
| cg24575275 | 7   | 1094737   | C7orf50      | -0.29    | 1.26E-06 |
| cg14920426 | 5   | 176924420 | PDLIM7       | -0.90    | 3.90E-05 |
| cg05399209 | 19  | 46010836  | VASP         | -1.23    | 5.71E-06 |
| cg09507928 | 5   | 140027484 | IK;NDUFA2    | -1.73    | 2.65E-05 |
| cg24114890 | 14  | 23834349  | EFS          | -0.71    | 3.27E-05 |
| cg05063806 | 1   | 36772417  | C1orf113     | -1.20    | 2.44E-05 |
| cg14167858 | 1   | 120199593 | --           | 0.09     | 1.97E-05 |
| cg02228675 | 17  | 40259724  | DHX58        | -0.27    | 2.96E-05 |
| cg14607755 | 9   | 139962279 | C9orf140     | -0.47    | 6.87E-06 |
| cg24630419 | 1   | 217311608 | ESRRG        | -0.36    | 2.45E-05 |
| cg27212903 | 15  | 92708880  | SLCO3A1      | 0.95     | 4.92E-06 |
| cg14605590 | 9   | 94900583  | LOC100128076 | -0.14    | 1.81E-04 |

Model adjusted for maternal [age at enrollment (continuous), smoking status (smoking during pregnancy / former / never), college graduate (yes / no), maternal atopy history (yes / no)], children [child's sex (female / male), race/ethnicity (white / black / other), gestational age (continuous), age at blood drawn (continuous)], and the cell-type proxys using the first five ReFACTor components estimated from cord blood.

**Table S9.** Genetic influences on DNA methylation of selected top hits—results from mQTL from an independent cohort. We restricted to SNPs with MAF >5% and within 500Kb away from the methylation site.

| <i>Life course analysis—“early programming”</i> |            |                |             |                  |                   |                      |                   |
|-------------------------------------------------|------------|----------------|-------------|------------------|-------------------|----------------------|-------------------|
| <b>CpG</b>                                      | <b>CHR</b> | <b>MAPINFO</b> | <b>Gene</b> | <b>Birth cis</b> | <b>No. of SNP</b> | <b>Childhood cis</b> | <b>No. of SNP</b> |
| cg25854298                                      | 10         | 73936754       | ASCC1       | --               | --                | --                   | --                |
| cg16416603                                      | 20         | 57593014       | TUBB1       | --               | --                | --                   | --                |
| cg11848324                                      | 14         | 20403845       | OR4K1       | --               | --                | --                   | --                |
| cg19549714                                      | 18         | 3447713        | TGIF1       | --               | --                | Yes                  | 2                 |
| cg23933289                                      | 1          | 178998656      | FAM20B      | --               | --                | --                   | --                |
| cg24576940                                      | 7          | 150648283      | KCNH2       | Yes              | 29                | Yes                  | 79                |
| cg13443997                                      | 9          | 139743586      | PHPT1       | --               | --                | --                   | --                |
| cg19954205                                      | 12         | 122211282      | TMEM120B    | --               | --                | --                   | --                |
| cg01782059                                      | 1          | 44715942       | ERI3        | --               | --                | --                   | --                |
| cg02133716                                      | 8          | 128981622      | PVT1        | --               | --                | --                   | --                |
| cg06226630                                      | 4          | 48493420       | ZAR1        | --               | --                | --                   | --                |
| cg20675173                                      | 3          | 43795541       | --          | --               | --                | --                   | --                |
| cg08067346                                      | 16         | 25011481       | ARHGAP17    | --               | --                | --                   | --                |
| cg09597192                                      | 6          | 32141591       | AGPAT1      | --               | --                | --                   | --                |
| cg16096766                                      | 13         | 52419714       | FLJ37307    | --               | --                | --                   | --                |
| cg00026222                                      | 1          | 2144244        | --          | --               | --                | --                   | --                |

  

| <i>Life course analysis—postnatal influences (top 20 methylation sites)</i> |            |                |                |                  |                   |                      |                   |
|-----------------------------------------------------------------------------|------------|----------------|----------------|------------------|-------------------|----------------------|-------------------|
| <b>CpG</b>                                                                  | <b>CHR</b> | <b>MAPINFO</b> | <b>Gene</b>    | <b>Birth cis</b> | <b>No. of SNP</b> | <b>Childhood cis</b> | <b>No. of SNP</b> |
| cg11699125                                                                  | 1          | 6341327        | ACOT7          | --               | --                | --                   | --                |
| cg02970679                                                                  | 17         | 56269818       | EPX            | --               | --                | --                   | --                |
| cg24491618                                                                  | 7          | 150649807      | KCNH2          | --               | --                | --                   | --                |
| cg01614759                                                                  | 10         | 45495435       | C10orf25;ZNF22 | --               | --                | --                   | --                |
| cg13054523                                                                  | 17         | 81055722       | --             | --               | --                | --                   | --                |
| cg21220721                                                                  | 1          | 6341230        | ACOT7          | --               | --                | --                   | --                |
| cg10065736                                                                  | 12         | 117440120      | FBXW8          | --               | --                | --                   | --                |
| cg06558622                                                                  | 7          | 149543177      | ZNF862         | --               | --                | --                   | --                |
| cg25854298                                                                  | 10         | 73936754       | ASCC1          | --               | --                | --                   | --                |
| cg05300717                                                                  | 11         | 65546210       | DKFZp761E198   | --               | --                | --                   | --                |
| cg09596645                                                                  | 3          | 181897670      | --             | --               | --                | --                   | --                |
| cg19928703                                                                  | 13         | 30143971       | SLC7A1         | --               | --                | --                   | --                |
| cg18368116                                                                  | 14         | 21436271       | --             | --               | --                | --                   | --                |
| cg20885063                                                                  | 17         | 17939419       | ATPAF2         | --               | --                | --                   | --                |

|            |    |           |        |     |    |     |    |
|------------|----|-----------|--------|-----|----|-----|----|
| cg08077807 | 14 | 62001072  | PRKCH  | --  | -- | --  | -- |
| cg07908654 | 13 | 41631052  | --     | --  | -- | --  | -- |
| cg08940169 | 16 | 88540241  | ZFPM1  | --  | -- | --  | -- |
| cg18879389 | 21 | 43771120  | TFF2   | Yes | 6  | Yes | 2  |
| cg20263733 | 3  | 130616293 | ATP2C1 | --  | -- | --  | -- |
| cg02985445 | 7  | 97908505  | --     | --  | -- | --  | -- |

***Life course analysis—“early programming “and postnatal influences***

| <b>CpG</b> | <b>CHR</b> | <b>MAPINFO</b> | <b>Gene</b> | <b>Birth<br/>cis</b> | <b>No. of SNP</b> | <b>Childhood<br/>cis</b> | <b>No. of SNP</b> |
|------------|------------|----------------|-------------|----------------------|-------------------|--------------------------|-------------------|
| cg25854298 | 10         | 73936754       | ASCC1       | --                   | --                | --                       | --                |
| cg11848324 | 14         | 20403845       | OR4K1       | --                   | --                | --                       | --                |
| cg23933289 | 1          | 178998656      | FAM20B      | --                   | --                | --                       | --                |
| cg24576940 | 7          | 150648283      | KCNH2       | Yes                  | 29                | Yes                      | 79                |
| cg02133716 | 8          | 128981622      | PVT1        | --                   | --                | --                       | --                |
| cg08067346 | 16         | 25011481       | ARHGAP17    | --                   | --                | --                       | --                |
| cg09597192 | 6          | 32141591       | AGPAT1      | --                   | --                | --                       | --                |

***Life course analysis—postnatal influences (asthma pathway)***

| <b>CpG</b> | <b>CHR</b> | <b>MAPINFO</b> | <b>Gene</b> | <b>Birth<br/>cis</b> | <b>No. of SNP</b> | <b>Childhood<br/>cis</b> | <b>No. of SNP</b> |
|------------|------------|----------------|-------------|----------------------|-------------------|--------------------------|-------------------|
| cg26787239 | 5          | 132008525      | IL4         | --                   | --                | --                       | --                |
| cg01310029 | 3          | 3152374        | IL5RA       | --                   | --                | --                       | --                |
| cg02970679 | 17         | 56269818       | EPX         | --                   | --                | --                       | --                |
| cg25173129 | 17         | 56269410       | EPX         | --                   | --                | --                       | --                |
| cg27469152 | 17         | 56282313       | EPX         | --                   | --                | --                       | --                |
| cg18421167 | 17         | 56276490       | EPX         | --                   | --                | --                       | --                |
| cg08105265 | 17         | 56274480       | EPX         | --                   | --                | --                       | --                |
| cg12819873 | 11         | 57157632       | PRG2        | --                   | --                | --                       | --                |
| cg15700636 | 11         | 57156050       | PRG2        | --                   | --                | --                       | --                |
| cg08295410 | 5          | 156990663      | ADAM19      | --                   | --                | --                       | --                |

**Table S10.** Summary statistics of selected methylation sites and their sign of associations for the prenatal and postnatal influences.

| <b>CpG</b> | <b>CHR</b> | <b>MAPINFO</b> | <b>Gene</b> | <b>Cord blood</b> | <b>Mid-childhood</b> | <b>ΔCpG</b> | <b>Sign of prenatal influences</b> | <b>Sign of postnatal influences</b> |
|------------|------------|----------------|-------------|-------------------|----------------------|-------------|------------------------------------|-------------------------------------|
| cg25854298 | 10         | 73936754       | ASCC1       | 92.78% (5.48%)    | 97.20% (2.13%)       | +4.41%      | -                                  | -                                   |
| cg11848324 | 14         | 20403845       | OR4K1       | 96.92% (1.52%)    | 97.38% (1.27%)       | +0.46%      | +                                  | +                                   |
| cg23933289 | 1          | 178998656      | FAM20B      | 90.23% (5.32%)    | 92.64% (3.21%)       | +2.41%      | -                                  | -                                   |
| cg24576940 | 7          | 150648283      | KCNH2       | 95.64% (3.66%)    | 98.37 (0.87%)        | +2.72%      | -                                  | -                                   |
| cg02133716 | 8          | 128981622      | PVT1        | 93.55% (5.18%)    | 97.23% (1.67%)       | +3.68%      | -                                  | -                                   |
| cg08067346 | 16         | 25011481       | ARHGAP17    | 92.60% (5.73%)    | 95.95% (3.19%)       | +4.41%      | -                                  | -                                   |
| cg09597192 | 6          | 32141591       | AGPAT1      | 93.58% (3.62%)    | 95.20% (2.61%)       | +1.62%      | -                                  | -                                   |



**Table S11.** Association between mid-childhood peripheral blood DNA methylation and mid-childhood IgE (FDR threshold <0.05) among the 210 children who had DNA methylation measurements both at mid-childhood only (top 20 methylation sites). Results are expressed as the change in log(IgE) concentration per 1% increase in mid-childhood methylation value.

|            |            |                |              | <i>Concurrent analysis</i><br>(N=243) |                |            |
|------------|------------|----------------|--------------|---------------------------------------|----------------|------------|
| <b>CpG</b> | <b>CHR</b> | <b>MAPINFO</b> | <b>Gene</b>  | <b>Estimate</b>                       | <b>P value</b> | <b>FDR</b> |
| cg11699125 | 1          | 6341327        | ACOT7        | -0.21                                 | 3.51E-09       | 1.38E-05   |
| cg02970679 | 17         | 56269818       | EPX          | -0.23                                 | 2.91E-10       | 2.18E-06   |
| cg24491618 | 7          | 150649807      | KCNH2        | -0.19                                 | 5.44E-14       | 2.85E-09   |
| cg01614759 | 10         | 45495435       | C10orf25     | -0.19                                 | 9.80E-08       | 1.58E-04   |
| cg13054523 | 17         | 81055722       | --           | -0.30                                 | 1.85E-08       | 4.80E-05   |
| cg21220721 | 1          | 6341230        | ACOT7        | -0.11                                 | 2.98E-14       | 2.34E-09   |
| cg10065736 | 12         | 117440120      | FBXW8        | -0.17                                 | 6.80E-10       | 3.96E-06   |
| cg06558622 | 7          | 149543177      | ZNF862       | -0.24                                 | 6.07E-06       | 3.79E-03   |
| cg25854298 | 10         | 73936754       | ASCC1        | -0.26                                 | 1.06E-08       | 3.14E-05   |
| cg05300717 | 11         | 65546210       | DKFZp761E198 | -0.34                                 | 3.45E-08       | 7.19E-05   |
| cg09596645 | 3          | 181897670      | --           | -0.18                                 | 6.81E-07       | 6.73E-04   |
| cg19928703 | 13         | 30143971       | SLC7A1       | -0.23                                 | 7.73E-07       | 7.50E-04   |
| cg18368116 | 14         | 21436271       | --           | -0.21                                 | 1.22E-08       | 3.45E-05   |
| cg20885063 | 17         | 17939419       | ATPAF2       | -0.19                                 | 8.87E-08       | 1.48E-04   |
| cg08077807 | 14         | 62001072       | PRKCH        | -0.36                                 | 1.35E-02       | 5.33E-01   |
| cg07908654 | 13         | 41631052       | --           | -0.15                                 | 3.42E-03       | 2.81E-01   |
| cg08940169 | 16         | 88540241       | ZFPM1        | -0.19                                 | 6.89E-09       | 2.28E-05   |
| cg18879389 | 21         | 43771120       | TFF2         | -0.22                                 | 3.37E-04       | 6.95E-02   |
| cg20263733 | 3          | 130616293      | ATP2C1       | -0.29                                 | 3.04E-07       | 3.81E-04   |
| cg02985445 | 7          | 97908505       | --           | -0.21                                 | 5.58E-12       | 1.03E-07   |

Model adjusted for maternal [age at enrollment (continuous), smoking status (smoking during pregnancy / former / never), college graduate (yes / no), maternal atopy history (yes / no)], children [child's sex (female / male), race/ethnicity (white / black / other), gestational age (continuous), age at blood drawn (continuous)], and the cell-type proxys using the first five ReFACTor components estimated from cord blood.
